# Supplementary material for: Expanding Fortification with Folic Acid: Thinking Outside the Cereal-Grain Box
Source: MDPI journal article supplement (doi:10.3390/nu16091312), 2024-04-27
Supplement: s1 [file s1]

Supplementary Table S1a: Bolivia Household Survey 2017 (*Encuesta de Hogares 2017*) (11,135 HH)\*

| <b>Food</b>                                                           | <b>%</b> | <b>Landscape for food**</b> | <b>Comments</b>               |
|-----------------------------------------------------------------------|----------|-----------------------------|-------------------------------|
| <i>Pan corriente (wheat flour roll)</i>                               | 89.9     | WF: 80% IP                  | Wheat flour is mandatory      |
| <i>Edible oil</i>                                                     | 88.3     | ND                          | Potential alternative vehicle |
| <i>Granulated sugar</i>                                               | 86.8     | ND                          | Potential alternative vehicle |
| <i>Potato</i>                                                         | 86.2     |                             |                               |
| <i>Rice</i>                                                           | 86.0     | ND                          | Potential alternative vehicle |
| <i>Eggs</i>                                                           | 85.4     |                             |                               |
| <i>Onion</i>                                                          | 84.8     |                             |                               |
| <i>Salt</i>                                                           | 84.5     | ND                          | Potential alternative vehicle |
| <i>Tomato</i>                                                         | 84.3     |                             |                               |
| <i>Noodle</i>                                                         | 79.5     | WF: 80% IP                  | Wheat flour is mandatory      |
| <i>Chicken meat (whole, sliced)</i>                                   | 79.3     |                             |                               |
| <i>Banana</i>                                                         | 77.6     |                             |                               |
| <i>Carrot</i>                                                         | 75.7     |                             |                               |
| <i>Tea</i>                                                            | 61.4     |                             |                               |
| <i>Liquid milk</i>                                                    | 60.3     | ND                          | Potential alternative vehicle |
| <i>Soft drink in bottle / can</i>                                     | 59.7     |                             |                               |
| <i>Other vegetables (squash, beans, pepper, etc.)</i>                 | 58.6     |                             |                               |
| <i>Boneless beef (special cuts)</i>                                   | 57.5     |                             |                               |
| <i>Cheese</i>                                                         | 54.2     |                             |                               |
| <i>Beef with bone (with fibers, second, third)</i>                    | 52.8     |                             |                               |
| <i>Apple</i>                                                          | 49.2     |                             |                               |
| <i>Cookies</i>                                                        | 46.5     | WF: 80% IP                  | Wheat flour is mandatory      |
| <i>Papaya</i>                                                         | 45.9     |                             |                               |
| <i>Natural herbs (chamomile, eucalyptus, boldo, cedrón, etc.)</i>     | 44.5     |                             |                               |
| <i>Other fruits, pineapple, lemon, mango, pear, even canned, etc.</i> | 43.4     |                             |                               |
| <i>Other cereals (oats, cereals in flakes, etc.)</i>                  | 42.2     |                             |                               |
| <i>Coffee</i>                                                         | 41.6     |                             |                               |
| <i>Yogurt</i>                                                         | 41.1     |                             |                               |
| <i>Chocolate-based powders (Toddy, Chocolike, etc.)</i>               | 40.8     |                             |                               |
| <i>Spices, sauces, condiments, seasonings and the like</i>            | 40.0     |                             |                               |
| <i>Lettuce</i>                                                        | 34.0     |                             |                               |
| <i>Flour (wheat, corn, etc.)</i>                                      | 38.3     | WF: 80% IP                  | Wheat flour is mandatory      |
| <i>Ground beef (current / special)</i>                                | 38.3     |                             |                               |
| <i>Quinoa</i>                                                         | 31.7     |                             |                               |
| <i>Watermelon</i>                                                     | 31.5     |                             |                               |
| <i>Milk powder</i>                                                    | 31.0     | ND                          | Potential alternative vehicle |

\*As HH sample size was consistent across foods, the individual food sample sizes are not shown.

\*\*The GFDx only collects data for industrially processed maize flour, oil, rice, salt, and wheat flour. Global Fortification Data Exchange. Chart: Quantity and Proportion of Industrially Processed Food Vehicles. Accessed 04/June/2019. [<http://www.fortificationdata.org>]

Abbreviations: WF, wheat flour; IP, industrially processed; ND, no data

Supplementary Table S1b: Burundi National Nutrition Survey 2005 (Enquête nutritionnelle nationale 2005)\*

| <b>Food</b>                   | <b>%</b> | <b>Landscape for food**</b> | <b>Comments</b>                                                         |
|-------------------------------|----------|-----------------------------|-------------------------------------------------------------------------|
| <i>Dark green leaves</i>      | 85.7     |                             |                                                                         |
| <i>Beans</i>                  | 84.8     |                             |                                                                         |
| <i>Palm oil</i>               | 67.1     | ND                          | Potential alternative vehicle                                           |
| <i>Cassava</i>                | 63.6     |                             |                                                                         |
| <i>Corn</i>                   | 47.0     | ND                          | Maize flour is mandatory; Unclear if this refers to fresh corn or flour |
| <i>Avocado</i>                | 44.2     |                             |                                                                         |
| <i>Sweet potatoes (white)</i> | 40.5     |                             |                                                                         |
| <i>Dry fish</i>               | 39.6     |                             |                                                                         |
| <i>Vegetable banana</i>       | 35.6     |                             |                                                                         |

\*Sample sizes for household and foods not reported

\*\*The GFDx only collects data for industrially processed maize flour, oil, rice, salt, and wheat flour. Global Fortification Data Exchange. Chart: Quantity and Proportion of Industrially Processed Food Vehicles. Accessed 04/June/2019. [<http://www.fortificationdata.org>]

Abbreviations: ND, no data

Supplementary Table S1c: El Salvador Multipurpose Household Survey 2014 (*Encuesta de Hogares de Propósitos Múltiples 2014*) (775,930 HH)\*

| <b>Food</b>                                                                   | <b>%</b> | <b>Landscape for food</b> | <b>Comments</b>               |
|-------------------------------------------------------------------------------|----------|---------------------------|-------------------------------|
| <i>Sugar</i>                                                                  | 50.0     |                           | Potential alternative vehicle |
| <i>Kitchen salt</i>                                                           | 49.8     |                           | Potential alternative vehicle |
| <i>Kitchen oil</i>                                                            | 47.0     |                           | Potential alternative vehicle |
| <i>Chicken eggs</i>                                                           | 45.8     |                           |                               |
| <i>Root crops, non-starchy bulbs and mushrooms (fresh, chilled or frozen)</i> | 38.2     |                           |                               |
| <i>Vegetables cultivated for their fruit</i>                                  | 34.1     |                           |                               |
| <i>Rice</i>                                                                   | 32.9     |                           | Potential alternative vehicle |
| <i>French bread</i>                                                           | 32.6     | WF: 100% IP               | Wheat flour is mandatory      |
| <i>Salsa, condiments</i>                                                      | 30.9     |                           |                               |
| <i>Chicken</i>                                                                | 30.3     |                           |                               |

\*As HH sample size was consistent across foods, the individual food sample sizes are not shown.

\*\*The GFDx only collects data for industrially processed maize flour, oil, rice, salt, and wheat flour. Global Fortification Data Exchange. Chart: Quantity and Proportion of Industrially Processed Food Vehicles. Accessed 04/June/2019. [<http://www.fortificationdata.org>.]

Abbreviations: WF, wheat flour; IP, industrially processed; ND, no data

Supplementary Table S1d: Ethiopia Socioeconomic Survey 2015-2016, Wave 3 (4,954 HH)

| <b>Food</b>                         | <b>% crude</b> | <b>% adjusted</b> | <b>Landscape for food**</b> | <b>Comments</b>                                                                |
|-------------------------------------|----------------|-------------------|-----------------------------|--------------------------------------------------------------------------------|
| <i>Salt</i>                         | 92.8           | 93.0              | ND                          | Potential alternative vehicle                                                  |
| <i>Red pepper (berbere)</i>         | 79.7           | 81.9              |                             |                                                                                |
| <i>Oils (processed)</i>             | 81.6           | 81.4              | ND                          | Potential alternative vehicle                                                  |
| <i>Onion</i>                        | 81.4           | 80.6              |                             |                                                                                |
| <i>Coffee</i>                       | 73.7           | 76.8              |                             |                                                                                |
| <i>Maize</i>                        | 52.4           | 54.3              | ND                          | Potential alternative vehicle<br>(unclear if referring to fresh corn or flour) |
| <i>Teff</i>                         | 49.3           | 52.4              | ND                          | Potential alternative vehicle                                                  |
| <i>Sugar</i>                        | 55.1           | 51.2              | ND                          | Potential alternative vehicle                                                  |
| <i>Green chili pepper (kariya)</i>  | 52.1           | 51.1              |                             |                                                                                |
| <i>Potato</i>                       | 46.9           | 44.2              |                             |                                                                                |
| <i>Horsebeans</i>                   | 37.1           | 43.6              |                             |                                                                                |
| <i>Greens (kale, cabbage, etc.)</i> | 44.6           | 43.1              |                             |                                                                                |
| <i>Tomato</i>                       | 49.7           | 41.2              |                             |                                                                                |
| <i>Wheat</i>                        | 40.1           | 40.7              | WF: 55% IP                  | Wheat flour is voluntary                                                       |
| <i>Sorghum</i>                      | 36.3           | 33.1              | ND                          | Potential alternative vehicle<br>(unclear if referring to grains or flour)     |
| <i>Milk</i>                         | 34.4           | 32.1              | ND                          | Potential alternative vehicle                                                  |
| <i>Field pea</i>                    | 33.1           | 31.2              |                             |                                                                                |
| <i>Tea</i>                          | 30.2           | 24.6              |                             |                                                                                |

\*As HH sample size was consistent across foods, the individual food sample sizes are not shown.

\*\*The GFDx only collects data for industrially processed maize flour, oil, rice, salt, and wheat flour. Global Fortification Data Exchange. Chart: Quantity and Proportion of Industrially Processed Food Vehicles. Accessed 04/June/2019. [<http://www.fortificationdata.org>.]

Abbreviations: WF, wheat flour; IP, industrially processed; ND, no data

Supplementary Table S1e: The Gambia Integrated Household Survey 2015

| <b>Food</b>                          | <b>%</b> | <b>n/N</b>    | <b>Landscape for food*</b> | <b>Comments</b>                              |
|--------------------------------------|----------|---------------|----------------------------|----------------------------------------------|
| <i>Sugar</i>                         | 98.4     | 12,781/12,984 | ND                         | Potential alternative vehicle                |
| <i>Salt</i>                          | 93.0     | 11,623/12,498 | ND                         | Potential alternative vehicle                |
| <i>Onion</i>                         | 92.0     | 11,923/12,962 |                            |                                              |
| <i>Maggi Cube</i>                    | 89.5     | 11,737/13,112 | ND                         | Bouillon cube; potential alternative vehicle |
| <i>Vegetable oil</i>                 | 85.4     | 11,158/13,064 | ND                         | Potential alternative vehicle                |
| <i>Chinese green tea(20)(Ataya)</i>  | 76.6     | 10,033/13,092 |                            |                                              |
| <i>Tomato puree (paste)</i>          | 72.6     | 9,551/13,158  |                            |                                              |
| <i>Peanut butter</i>                 | 71.8     | 9,229/12,855  |                            |                                              |
| <i>Fresh Bonga (fish)</i>            | 71.3     | 9,355/13,127  |                            |                                              |
| <i>Bread</i>                         | 71.2     | 9,331/13,115  | ND                         | Potential alternative vehicle                |
| <i>Palm oil</i>                      | 68.7     | 8,989/13,092  | ND                         | Potential alternative vehicle                |
| <i>Chili powder (black pepper)</i>   | 52.2     | 6,865/13,142  |                            |                                              |
| <i>Big red pepper</i>                | 51.5     | 6,774/13,142  |                            |                                              |
| <i>Bitter tomato</i>                 | 43.0     | 5,631/13,092  |                            |                                              |
| <i>Tea bags</i>                      | 43.0     | 5,600/13,026  |                            |                                              |
| <i>Bisap</i>                         | 41.9     | 5,188/12,397  |                            |                                              |
| <i>Smoked bonga (fish)</i>           | 41.1     | 5,410/13,150  |                            |                                              |
| <i>Small grained rice (imported)</i> | 41.0     | 5,317/12,979  | 100% IP**                  | Potential alternative vehicle                |
| <i>Garden eggs</i>                   | 40.6     | 5,296/13,054  |                            |                                              |
| <i>Okra</i>                          | 40.3     | 5,245/13,022  |                            |                                              |
| <i>Tomatoes-fresh</i>                | 39.2     | 5,131/13,090  |                            |                                              |
| <i>Locust beans (Neteetu)</i>        | 38.1     | 5,013/13,152  |                            |                                              |
| <i>Small Pepper-fresh</i>            | 37.2     | 4,870/13,109  |                            |                                              |
| <i>Small dry pepper</i>              | 35.7     | 4,683/13,122  |                            |                                              |
| <i>Dried fish</i>                    | 34.9     | 4,581/13,138  |                            |                                              |
| <i>Millet</i>                        | 33.6     | 4,338/12,912  | ND                         | Potential alternative vehicle                |
| <i>Garlic</i>                        | 32.2     | 4,242/13,157  |                            |                                              |
| <i>Biscuit</i>                       | 30.7     | 4,047/13,166  | WF: 100% IP                | Potential alternative vehicle                |

\*The GFDx only collects data for industrially processed maize flour, oil, rice, salt, and wheat flour. Source: Global Fortification Data Exchange. Chart: Quantity and Proportion of Industrially Processed Food Vehicles. Accessed 04/June/2019. [<http://www.fortificationdata.org>.]

\*\*Imported rice is assumed 100% industrially produced

Abbreviations: WF, wheat flour; IP, industrially processed; ND, no data

Supplementary Table S1f: National Sample Survey 68<sup>th</sup> Round, Household Consumption of Various Goods and Services in India 2011-2012 (59,678 HH)\*

| <b>Food**</b>                  | <b>%***</b> | <b>Landscape for food****</b> | <b>Comments</b>                      |
|--------------------------------|-------------|-------------------------------|--------------------------------------|
| 170 salt                       | 98.1        | ND                            | Potential alternative vehicle        |
| 201 onion                      | 95.9        |                               |                                      |
| 254 turmeric (gm)              | 94.9        |                               |                                      |
| 200 potato                     | 91.1        |                               |                                      |
| 251 garlic (gm)                | 89.6        |                               |                                      |
| 271 tea: leaf (gm)             | 86.1        |                               |                                      |
| 172 sugar – other sources      | 85.1        | ND                            | Potential alternative vehicle        |
| 256 dry chilies (gm)           | 85.0        |                               |                                      |
| 102 rice – other sources       | 84.6        | Rice: 50% IP                  | Voluntary fortification              |
| 207 green chilies              | 83.1        |                               |                                      |
| 252 jeera (gm)                 | 82.2        |                               |                                      |
| 160 milk: liquid (litre)       | 78.0        | ND                            | Potential alternative vehicle        |
| 253 dhanja (gm)                | 74.7        |                               |                                      |
| 202 tomato                     | 74.6        |                               |                                      |
| 250 ginger (gm)                | 69.4        |                               |                                      |
| 291 biscuits, chocolates, etc. | 68.3        | WF: 30% IP                    | Voluntary fortification (biscuits)   |
| 108 wheat/atta – other sources | 67.4        | WF: 30% IP                    | Voluntary fortification              |
| 261 other spices (gm)          | 64.8        |                               |                                      |
| 206 palak/other                | 61.2        |                               |                                      |
| 140 arhar, tur                 | 59.6        |                               |                                      |
| 217 other vegetables           | 58.1        |                               |                                      |
| 203 brinjal                    | 57.8        |                               |                                      |
| 181 mustard oil                | 52.7        |                               |                                      |
| 101 rice – P.D.S.              | 45.9        | 50% IP                        | Voluntary fortification              |
| 143 moong                      | 45.6        |                               |                                      |
| 283 cooked snacks purchased    | 44.7        |                               |                                      |
| 260 oilseeds (gm)              | 44.6        |                               |                                      |
| 144 masur                      | 41.1        |                               |                                      |
| 141 gram: split                | 39.9        |                               |                                      |
| 145 urd                        | 38.9        |                               |                                      |
| 270 tea: cups (no.)            | 37.3        |                               |                                      |
| 220 banana (no.)               | 36.5        |                               |                                      |
| 184 refined oil                | 35.7        | ND                            | Potential alternative vehicle        |
| 292 papad, bhujia, namkeen     | 34.9        |                               |                                      |
| 151 besan                      | 34.7        |                               |                                      |
| 107 wheat/atta – P.D.S.        | 33.9        | WF: 30% IP                    | Voluntary fortification              |
| 171 sugar – PDS                | 33.7        | ND                            | Potential alternative vehicle        |
| 208 lady's finger              | 33.6        |                               | Assumed this is okra, not the cookie |
| 213 gourd, pumpkin             | 33.2        |                               |                                      |

\*As HH sample size was consistent across foods, the individual food sample sizes are not shown.

\*\*The food's purchase/consumption reference period is 30 days for items 101-179 and 7 days for items 180-299

\*\*\*% is taken from the report per 1,000 households, not the sample size estimate

\*\*\*\* The GFDx only collects data for industrially processed maize flour, oil, rice, salt, and wheat flour. Source: Global Fortification Data Exchange. Chart: Quantity and Proportion of Industrially Processed Food Vehicles. Accessed 04/June/2019. [<http://www.fortificationdata.org>]

Abbreviations: WF, wheat flour; IP, industrially processed; ND, no data

Supplementary Table S1g: Kosovo Living Standards Measurement Survey 2000

| <b>Food</b>                                     | <b>%</b> | <b>n/N</b>  | <b>Landscape for food*</b> | <b>Comments</b>               |
|-------------------------------------------------|----------|-------------|----------------------------|-------------------------------|
| <i>Coffee</i>                                   | 96.4     | 2,735/2,838 |                            |                               |
| <i>Tea</i>                                      | 94.7     | 2,295/2,423 |                            |                               |
| <i>Soft drinks (Coca and juices)</i>            | 92.4     | 2,450/2,653 |                            |                               |
| <i>Baby formula</i>                             | 91.9     | 486/529     | ND                         | Likely already fortified      |
| <i>Spices</i>                                   | 89.9     | 2,101/2,337 |                            |                               |
| <i>Yeast</i>                                    | 87.4     | 2,131/2,439 |                            |                               |
| <i>Orange and lemons</i>                        | 84.0     | 1,717/2,043 |                            |                               |
| <i>Fast food: bureks, etc...</i>                | 81.0     | 251/310     |                            |                               |
| <i>Chicken</i>                                  | 77.6     | 2,065/2,662 |                            |                               |
| <i>Grapes</i>                                   | 76.9     | 1,718/2,234 |                            |                               |
| <i>Eggs</i>                                     | 76.8     | 2,134/2,779 |                            |                               |
| <i>Biscuits</i>                                 | 75.2     | 1,286/1,711 | WF: 70% IP                 | Wheat flour is mandatory      |
| <i>Beer</i>                                     | 73.7     | 451/612     |                            |                               |
| <i>Other fruits</i>                             | 67.7     | 598/884     |                            |                               |
| <i>Misc. Other food expenses</i>                | 66.4     | 279/420     |                            |                               |
| <i>Beef/buffalo</i>                             | 63.7     | 1,320/2,073 |                            |                               |
| <i>Bread</i>                                    | 62.5     | 1,241/1,985 | WF: 70% IP                 | Wheat flour is mandatory      |
| <i>Milk</i>                                     | 62.1     | 1,684/2,712 | ND                         | Potential alternative vehicle |
| <i>Apples</i>                                   | 61.1     | 1,405/2,300 |                            |                               |
| <i>Pasta and rice (macaroni)</i>                | 60.8     | 1,669/2,746 | WF: 70% IP                 | Wheat flour is mandatory      |
| <i>Slivovica</i>                                | 59.6     | 274/460     |                            |                               |
| <i>Fresh cheese</i>                             | 59.3     | 1,418/2,391 |                            |                               |
| <i>Sweet pepper</i>                             | 58.0     | 1,618/2,791 |                            |                               |
| <i>Cabbage</i>                                  | 57.9     | 1,377/2,377 |                            |                               |
| <i>Jam and</i>                                  | 56.7     | 912/1,601   |                            |                               |
| <i>Butter and other fat</i>                     | 53.4     | 706/1,321   |                            |                               |
| <i>Beans</i>                                    | 48.5     | 1,345/2,774 |                            |                               |
| <i>Tomatoes</i>                                 | 47.8     | 1,317/2,753 |                            |                               |
| <i>Curd</i>                                     | 46.2     | 755/1,635   |                            |                               |
| <i>Other vegetables</i>                         | 45.7     | 301/658     |                            |                               |
| <i>Yogurt</i>                                   | 43.2     | 846/1,960   |                            |                               |
| <i>Canned foods</i>                             | 41.9     | 242/577     |                            |                               |
| <i>Cucumber</i>                                 | 38.3     | 888/2,319   |                            |                               |
| <i>Fish</i>                                     | 35.0     | 271/774     |                            |                               |
| <i>Garlic</i>                                   | 33.9     | 737/2,173   |                            |                               |
| <i>Pork</i>                                     | 32.3     | 139/430     |                            |                               |
| <i>Maize and other cereals (flour or grain)</i> | 30.1     | 339/1,127   | MF: 48% IP                 | Potential alternative vehicle |

\* The GFDx only collects data for industrially processed maize flour, oil, rice, salt, and wheat flour. Source: Global Fortification Data Exchange. Chart: Quantity and Proportion of Industrially Processed Food Vehicles. Accessed 04/June/2019. [<http://www.fortificationdata.org>.]

Abbreviations: WF, wheat flour; IP, industrially processed; ND, no data; MF, maize flour

Supplementary Table S1h: Liberia Household Income and Expenditure Survey 2016

| <b>Food</b>                                                                        | <b>%</b> | <b>n/N</b>  | <b>Landscape for food*</b> | <b>Comments</b>               |
|------------------------------------------------------------------------------------|----------|-------------|----------------------------|-------------------------------|
| <i>Salt</i>                                                                        | 94.7     | 7,906/8,350 | Salt: 100% IP              | Potential alternative vehicle |
| <i>Bouillon cubes (maggi, jumbo, etc)</i>                                          | 93.9     | 7,842/8,350 | Salt: 100% IP              | Potential alternative vehicle |
| <i>Palm oil</i>                                                                    | 84.7     | 7,073/8,350 | ND                         | Potential alternative vehicle |
| <i>Onions</i>                                                                      | 72.3     | 6,032/8,349 |                            |                               |
| <i>Smoked fish (dried/salted)</i>                                                  | 69.7     | 5,819/8,350 |                            |                               |
| <i>Palm nuts</i>                                                                   | 68.1     | 5,686/8,350 |                            |                               |
| <i>Bitter balls/Kitilay</i>                                                        | 67.0     | 5,595/8,350 |                            |                               |
| <i>Dry pepper</i>                                                                  | 64.9     | 5,418/8,350 |                            |                               |
| <i>Imported Rice (including pusswa, butter rice, etc.)</i>                         | 62.6     | 5,223/8,350 | 100%**                     | Potential alternative vehicle |
| <i>Potato greens/ sweet potato greens</i>                                          | 60.9     | 5,087/8,349 |                            |                               |
| <i>Cassava leaves</i>                                                              | 60.2     | 5,024/8,349 |                            |                               |
| <i>Cassava roots</i>                                                               | 60.0     | 5,005/8,348 |                            |                               |
| <i>Fresh pepper</i>                                                                | 59.1     | 4,936/8,350 |                            |                               |
| <i>Fresh fish (cassava fish, cavalla fish, mackerel, snappers, soul fish etc.)</i> | 55.0     | 4,597/8,350 |                            |                               |
| <i>Cassava flour (fufu), gari</i>                                                  | 46.2     | 3,856/8,349 |                            |                               |
| <i>Local rice</i>                                                                  | 42.7     | 3,561/8,349 | Rice: 1%                   | Potential alternative vehicle |
| <i>Chicken feet</i>                                                                | 41.7     | 3,483/8,350 |                            |                               |
| <i>Okra</i>                                                                        | 35.6     | 2,968/8,349 |                            |                               |
| <i>Sugar</i>                                                                       | 34.7     | 2,894/8,349 | ND                         | Potential alternative vehicle |
| <i>Argo oils/ vegetable oils / olive oil</i>                                       | 33.2     | 2,768/8,349 | ND                         | Potential alternative vehicle |
| <i>Plantains</i>                                                                   | 32.7     | 2,728/8,350 |                            |                               |
| <i>Frozen chicken</i>                                                              | 32.3     | 2,695/8,350 |                            |                               |
| <i>Wild/Bush meat (Porcupine gazelle, palm worms, chenilles, monkey meat)</i>      | 31.1     | 2,597/8,350 |                            |                               |

\*The GFDx only collects data for industrially processed maize flour, oil, rice, salt, and wheat flour. Source: Global Fortification Data Exchange. Chart: Quantity and Proportion of Industrially Processed Food Vehicles. Accessed 04/June/2019. [<http://www.fortificationdata.org>.]

\*\*Imported rice is assumed 100% industrially produced

Abbreviations: WF, wheat flour; IP, industrially processed; ND, no data

Supplementary Table S1i: Malawi Fourth Integrated Household Survey 2016-2017 (12,447 HH)\*

| <b>Food</b>                            | <b>%</b> | <b>Landscape for food**</b> | <b>Comments</b>               |
|----------------------------------------|----------|-----------------------------|-------------------------------|
| <i>Salt</i>                            | 99.9     | ND                          | Potential alternative vehicle |
| <i>Tomato</i>                          | 84.1     |                             |                               |
| <i>Cooking oil</i>                     | 76.1     | ND                          | Potential alternative vehicle |
| <i>Nkhwani (pumpkin leaves)</i>        | 70.7     |                             |                               |
| <i>Maize ufa mgaiwa (normal flour)</i> | 63.9     | MF: 15% IP                  | Maize flour is mandatory      |
| <i>Sugar</i>                           | 56.2     | ND                          | Potential alternative vehicle |
| <i>Tanaposi/Rape</i>                   | 47.5     |                             |                               |
| <i>Onion</i>                           | 47.0     |                             |                               |
| <i>Maize ufa refined (fine flour)</i>  | 43.7     | MF: 15% IP                  | Maize flour is mandatory      |
| <i>Bean, brown</i>                     | 42.1     |                             |                               |
| <i>Okra / Therere</i>                  | 40.7     |                             |                               |
| <i>Sun Dried fish (Small Variety)</i>  | 40.7     |                             |                               |
| <i>Mandazi, doughnut (vendor)</i>      | 34.4     | WF: 98% IP                  | Wheat flour is mandatory      |
| <i>Eggs</i>                            | 31.9     |                             |                               |

\*As HH sample size was consistent across foods, the individual food sample sizes are not shown.

\*\*The GFDx only collects data for industrially processed maize flour, oil, rice, salt, and wheat flour. Source: Global Fortification Data Exchange. Chart: Quantity and Proportion of Industrially Processed Food Vehicles. Accessed 04/June/2019. [<http://www.fortificationdata.org>.]

Abbreviations: WF, wheat flour; IP, industrially processed; ND, no data; MF, maize flour

Supplementary Table S1j: Mozambique Household Budget Survey 2008-2009 (Inquérito aos Agregados Familiares)\*, N=2,807

| <b>Food</b>                                    | <b>%</b> | <b>Landscape for food**</b> | <b>Comments</b>               |
|------------------------------------------------|----------|-----------------------------|-------------------------------|
| <i>Salt</i>                                    | 98.3     | ND                          | Potential alternative vehicle |
| <i>Water</i>                                   | 97.7     |                             |                               |
| <i>Other cultivated green leafy vegetables</i> | 82.7     |                             |                               |
| <i>Maize ufamgaiwa (normal flour)</i>          | 68.3     | MF: 30% IP                  | Maize flour is mandatory      |
| <i>Cooking oil</i>                             | 55.1     | ND                          | Potential alternative vehicle |
| <i>Dried fish</i>                              | 48.6     |                             |                               |
| <i>Cassava flour</i>                           | 46.7     |                             |                               |
| <i>Onion</i>                                   | 46.4     |                             |                               |
| <i>Green maize</i>                             | 44.0     |                             | Assumed this is fresh maize   |
| <i>Tomato</i>                                  | 42.4     |                             |                               |
| <i>Cowpea (khobwe)</i>                         | 41.8     |                             |                               |
| <i>Cassava tubers</i>                          | 38.8     |                             |                               |
| <i>Groundnut</i>                               | 35.7     |                             |                               |
| <i>Sugar</i>                                   | 32.2     | ND                          | Potential alternative vehicle |
| <i>Bread</i>                                   | 31.0     | WF: 100% IP                 | Wheat flour is mandatory      |

\*Several foods with reach >30% or greater removed where sample sizes were 11 or less; all remaining foods had sample sizes of 2,807

\*\*The GFDx only collects data for industrially processed maize flour, oil, rice, salt, and wheat flour. Source: Global Fortification Data Exchange. Chart: Quantity and Proportion of Industrially Processed Food Vehicles. Accessed 04/June/2019. [<http://www.fortificationdata.org>.]

Abbreviations: WF, wheat flour; IP, industrially processed; ND, no data; MF, maize flour

Supplementary Table S1k: Niger National Survey on Household Living Conditions and Agriculture 2014, Wave 2 Panel Data (l'Enquête Nationale sur les Conditions de Vie des Ménages et l'Agriculture) (1<sup>st</sup> visit: 3,617 HH, 2<sup>nd</sup> visit: 3,143 HH)\*

| <b>Food</b>                                               | <b>%, 1<sup>st</sup> visit</b> | <b>%, 2<sup>nd</sup> visit</b> | <b>Landscape for food**</b> | <b>Comments</b>               |
|-----------------------------------------------------------|--------------------------------|--------------------------------|-----------------------------|-------------------------------|
| <i>Salt</i>                                               | 94.2                           | 95.2                           | ND                          | Potential alternative vehicle |
| <i>Maggi cube</i>                                         | 93.9                           | 89.2                           | ND                          | Potential alternative vehicle |
| <i>Millet</i>                                             | 84.7                           | 81.0                           | ND                          | Potential alternative vehicle |
| <i>Palm oil</i>                                           | 80.6                           | 76.4                           | ND                          | Potential alternative vehicle |
| <i>Chilli pepper</i>                                      | 77.9                           | 76.5                           |                             |                               |
| <i>Sugar</i>                                              | 75.9                           | 75.5                           | ND                          | Potential alternative vehicle |
| <i>Rice</i>                                               | 75.9                           | 70.3                           | ND                          | Potential alternative vehicle |
| <i>Fresh onion</i>                                        | 73.0                           | 57.2                           |                             |                               |
| <i>Soumbala (base of sorrel or niere)</i>                 | 71.4                           | 67.6                           |                             |                               |
| <i>Dried beans</i>                                        | 60.4                           | 51.5                           |                             |                               |
| <i>Okra dry</i>                                           | 55.6                           | 41.0                           |                             |                               |
| <i>Maize</i>                                              | 55.0                           | 44.3                           | ND                          | Potential alternative vehicle |
| <i>Pasta</i>                                              | 52.1                           | 45.4                           | WF: 100% IP                 | Wheat flour is mandatory      |
| <i>Baobab leaves</i>                                      | 50.4                           | 44.0                           |                             |                               |
| <i>Fresh tomato</i>                                       | 49.0                           | 21.2                           |                             |                               |
| <i>Tomato concentrate</i>                                 | 47.9                           | 38.5                           |                             |                               |
| <i>Other spices and condiments (garlic, ginger, etc.)</i> | 47.7                           | 52.6                           |                             |                               |
| <i>Malahya (Fakkou)</i>                                   | 42.4                           | 43.1                           |                             |                               |
| <i>Curdled milk/yogurt (lait caillé)</i>                  | 41.4                           | 45.1                           |                             |                               |
| <i>Cassava flour (attiéke, gari, tapioca)</i>             | 39.3                           | 22.6                           |                             |                               |
| <i>Dried tomato</i>                                       | 37.0                           | 30.2                           |                             |                               |
| <i>Tea in pack or packet</i>                              | 36.7                           | 33.6                           |                             |                               |
| <i>Bean fritters</i>                                      | 36.6                           | 36.3                           |                             |                               |
| <i>Cola nuts</i>                                          | 35.0                           | 36.3                           |                             |                               |
| <i>Salad (lettuce)</i>                                    | 34.9                           | 3.1                            |                             |                               |
| <i>Squash and zucchini</i>                                | 33.4                           | 31.3                           |                             |                               |
| <i>Beef</i>                                               | 30.8                           | 22.4                           |                             |                               |

\*As HH sample size was consistent across foods, the individual food sample sizes are not shown.

Foods in red did not have at least 30% reach when reported during the 2<sup>nd</sup> HH visit of the survey

\*\*The GFDx only collects data for industrially processed maize flour, oil, rice, salt, and wheat flour. Source: Global Fortification Data Exchange. Chart: Quantity and Proportion of Industrially Processed Food Vehicles. Accessed 04/June/2019. [<http://www.fortificationdata.org>.]

Abbreviations: WF, wheat flour; IP, industrially processed; ND, no data

Supplementary Table S1l: Nigeria - General Household Survey, Panel 2015-2016, Wave 3 (4,580 HH)\*

| <b>Food</b>                                            | <b>%</b> | <b>Landscape for food**</b> | <b>Comments</b>               |
|--------------------------------------------------------|----------|-----------------------------|-------------------------------|
| <i>Oil and fats: palm oil</i>                          | 92.9     | ND                          | Potential alternative vehicle |
| <i>Vegetables: onions</i>                              | 90.6     |                             |                               |
| <i>Salt</i>                                            | 89.6     | Salt: 20% IP                | Potential alternative vehicle |
| <i>Vegetables: tomatoes</i>                            | 78.0     |                             |                               |
| <i>Vegetables : fresh pepper</i>                       | 69.9     |                             |                               |
| <i>Pulses, nuts and seeds, white beans</i>             | 63.2     |                             |                               |
| <i>Starchy roots. Tubers &amp; plantain, yam-roots</i> | 59.5     |                             |                               |
| <i>Bread</i>                                           | 57.6     | WF: 100% IP                 | Wheat flour is mandatory      |
| <i>Sugar, sweets and confectionary :sugar</i>          | 52.1     | ND                          | Potential alternative vehicle |
| <i>Oil and fats: groundnut oil</i>                     | 50.3     | ND                          | Potential alternative vehicle |
| <i>Grain and flours: rice-local</i>                    | 46.5     | Rice: 40% IP                | Potential alternative vehicle |
| <i>Grain and flours: rice-imported</i>                 | 45.6     | 100% IP***                  | Potential alternative vehicle |
| <i>Meat: beef</i>                                      | 42.5     |                             |                               |
| <i>Starchy roots, tubers and plantain: gari-white</i>  | 37.4     |                             |                               |
| <i>Fish and seafood: fish-frozen</i>                   | 36.8     |                             |                               |
| <i>Grain and flours: guinea corn/sorghum</i>           | 32.9     | ND                          | Potential alternative vehicle |
| <i>Vegetables: okra-fresh</i>                          | 32.2     |                             |                               |

\*As HH sample size was consistent across foods, the individual food sample sizes are not shown.

\*\*The GFDx only collects data for industrially processed maize flour, oil, rice, salt, and wheat flour. Source: Global Fortification Data Exchange. Chart: Quantity and Proportion of Industrially Processed Food Vehicles. Accessed 04/June/2019. [<http://www.fortificationdata.org>.]

\*\*\*Imported rice is assumed 100% industrially produced

Abbreviations: WF, wheat flour; IP, industrially processed; ND, no data

Supplementary Table S1m: Philippines National Nutrition Survey 2008\*

| <b>Food</b>            | <b>%</b> | <b>Landscape for food**</b> | <b>Comments</b>               |
|------------------------|----------|-----------------------------|-------------------------------|
| <i>Rice</i>            | 95.2     | Rice: 29% IP                | Potential alternative vehicle |
| <i>Sugar</i>           | 75.3     | ND                          | Potential alternative vehicle |
| <i>Cooking oil</i>     | 71.8     | ND                          | Potential alternative vehicle |
| <i>Coffee, instant</i> | 60.8     |                             |                               |
| <i>Bread</i>           | 40.6     | WF: 100% IP                 | Potential alternative vehicle |
| <i>Chicken eggs</i>    | 33.7     |                             |                               |

\*Sample sizes for household and foods not reported

\*\*The GFDx only collects data for industrially processed maize flour, oil, rice, salt, and wheat flour. Source: Global Fortification Data Exchange. Chart: Quantity and Proportion of Industrially Processed Food Vehicles. Accessed 04/June/2019. [<http://www.fortificationdata.org>.]

Abbreviations: WF, wheat flour; IP, industrially processed; ND, no data



Supplementary Table S1n: Sierra Leone Integrated Household Survey 2011

| <b>Food</b>                                          | <b>%</b> | <b>n/N</b>  | <b>Landscape for food*</b> | <b>Comments</b>               |
|------------------------------------------------------|----------|-------------|----------------------------|-------------------------------|
| <i>Salt</i>                                          | 93.7     | 6,299/6,723 | ND                         | Potential alternative vehicle |
| <i>Onions</i>                                        | 89.5     | 6,016/6,722 |                            |                               |
| <i>Palm oil</i>                                      | 88.5     | 5,950/6,723 | ND                         | Potential alternative vehicle |
| <i>Fish-dried</i>                                    | 72.3     | 4,860/6,720 |                            |                               |
| <i>Rice-imported</i>                                 | 69.4     | 4,668/6,725 | 100%**                     | Potential alternative vehicle |
| <i>Pepper fresh</i>                                  | 67.0     | 4,504/6,723 |                            |                               |
| <i>Condiments (spices, etc)</i>                      | 64.7     | 4,341/6,708 |                            |                               |
| <i>Groundnuts-roasted</i>                            | 58.4     | 3,921/6,713 |                            |                               |
| <i>Potato leaves</i>                                 | 51.7     | 3,474/6,717 |                            |                               |
| <i>Cassava leaves</i>                                | 49.8     | 3,343/6,710 |                            |                               |
| <i>Sugar</i>                                         | 45.7     | 3,064/6,710 | ND                         | Potential alternative vehicle |
| <i>Fish-fresh</i>                                    | 45.6     | 3,063/6,719 |                            |                               |
| <i>Cassava</i>                                       | 38.6     | 2,592/6,722 |                            |                               |
| <i>Other foods (not mentioned elsewhere)</i>         | 37.8     | 2,533/6,694 |                            |                               |
| <i>Big beans</i>                                     | 35.3     | 2,369/6,716 |                            |                               |
| <i>Bread (incl. Rice bread, cassava, bread, etc)</i> | 35.0     | 2,350/6,720 | WF: 100% IP                | Wheat flour is voluntary      |
| <i>Other leafy vegetables</i>                        | 33.5     | 2,250/6,713 |                            |                               |
| <i>Pepper - dried</i>                                | 33.0     | 2,215/6,713 |                            |                               |
| <i>Okra-fresh</i>                                    | 30.7     | 2,060/6,719 |                            |                               |

\*The GFDx only collects data for industrially processed maize flour, oil, rice, salt, and wheat flour. Source: Global Fortification Data Exchange. Chart: Quantity and Proportion of Industrially Processed Food Vehicles. Accessed 04/June/2019. [<http://www.fortificationdata.org>.]

\*\*Imported rice is assumed 100% industrially produced

Abbreviations: WF, wheat flour; IP, industrially processed; ND, no data

Supplementary Table S1o: Somaliland Household Survey 2013, Adapted for the Somali High Frequency Survey (1,725 HH)\*

| <b>Food</b>                | <b>%</b> | <b>Landscape for food**</b> | <b>Comments</b>               |
|----------------------------|----------|-----------------------------|-------------------------------|
| <i>Rice, husked</i>        | 97.3     | ND                          | Potential alternative vehicle |
| <i>Sugar</i>               | 95.0     | ND                          | Potential alternative vehicle |
| <i>Salt</i>                | 94.7     | ND                          | Potential alternative vehicle |
| <i>Tea</i>                 | 88.8     |                             |                               |
| <i>Onion</i>               | 84.4     |                             |                               |
| <i>Potatoes</i>            | 82.8     |                             |                               |
| <i>Millet, flour</i>       | 80.6     | ND                          | Potential alternative vehicle |
| <i>Tomatoes</i>            | 80.0     |                             |                               |
| <i>Other cooking oil</i>   | 78.3     | ND                          | Potential alternative vehicle |
| <i>Macaroni, spaghetti</i> | 72.9     | WF: 100% IP                 | Potential alternative vehicle |
| <i>Garlic</i>              | 57.6     |                             |                               |
| <i>Goat/Sheep</i>          | 51.4     |                             |                               |
| <i>Ladies finger/okra</i>  | 49.6     |                             |                               |
| <i>Bread</i>               | 46.4     | WF: 100% IP                 | Potential alternative vehicle |
| <i>Milk</i>                | 43.5     | ND                          | Potential alternative vehicle |

\*As HH sample size was consistent across foods, the individual food sample sizes are not shown.

\*\*The GFDx only collects data for industrially processed maize flour, oil, rice, salt, and wheat flour. Source: Global Fortification Data Exchange. Chart: Quantity and Proportion of Industrially Processed Food Vehicles. Accessed 04/June/2019. [<http://www.fortificationdata.org>.]

Abbreviations: WF, wheat flour; IP, industrially processed; ND, no data

Supplementary Table S1p: Tajikistan Living Standards Survey 2009 (3,352 HH)\*

| <b>Food</b>                                             | <b>%</b> | <b>Landscape for food**</b> | <b>Comments</b>               |
|---------------------------------------------------------|----------|-----------------------------|-------------------------------|
| <i>Tea</i>                                              | 99.6     |                             |                               |
| <i>Onions</i>                                           | 99.1     |                             |                               |
| <i>Potatoes</i>                                         | 98.8     |                             |                               |
| <i>Salt</i>                                             | 98.4     | ND                          | Potential alternative vehicle |
| <i>Vegetable oil</i>                                    | 95.7     | ND                          | Potential alternative vehicle |
| <i>Sugar</i>                                            | 94.7     | ND                          | Potential alternative vehicle |
| <i>Carrots</i>                                          | 90.7     |                             |                               |
| <i>Rice</i>                                             | 86.7     | Rice: 100% IP               | Potential alternative vehicle |
| <i>Macaroni products</i>                                | 79.8     | WF: 60% IP                  | Potential alternative vehicle |
| <i>Flour</i>                                            | 76.9     | WF: 60% IP                  | Potential alternative vehicle |
| <i>Beef</i>                                             | 69.0     |                             |                               |
| <i>Apples</i>                                           | 68.6     |                             |                               |
| <i>Grapes</i>                                           | 67.9     |                             |                               |
| <i>Eggs</i>                                             | 63.6     |                             |                               |
| <i>Fresh milk</i>                                       | 59.1     | ND                          | Potential alternative vehicle |
| <i>Tomatoes</i>                                         | 57.3     |                             |                               |
| <i>Dried beans, pulses (beans, peas, lentils, etc.)</i> | 46.0     |                             |                               |
| <i>Sweets, eastern sweets</i>                           | 40.3     |                             |                               |
| <i>Butter</i>                                           | 37.0     |                             |                               |
| <i>Pumpkin</i>                                          | 34.0     |                             |                               |

\*As HH sample size was consistent across foods, the individual food sample sizes are not shown.

\*\*The GFDx only collects data for industrially processed maize flour, oil, rice, salt, and wheat flour. Source: Global Fortification Data Exchange. Chart: Quantity and Proportion of Industrially Processed Food Vehicles. Accessed 04/June/2019. [<http://www.fortificationdata.org>.]

Abbreviations: WF, wheat flour; IP, industrially processed; ND, no data

Supplementary Table S1q: Tanzania National Panel Survey 2014-2015, Wave 4 (3,352 HH)\*

| <b>Food</b>                                                     | <b>%</b> | <b>Landscape for food**</b> | <b>Comments</b>               |
|-----------------------------------------------------------------|----------|-----------------------------|-------------------------------|
| <i>Salt</i>                                                     | 97.3     | ND                          | Potential alternative vehicle |
| <i>Onions, tomatoes, carrots and green pepper, other viungu</i> | 90.3     |                             |                               |
| <i>Cooking oil</i>                                              | 86.4     | ND                          | Potential alternative vehicle |
| <i>Maize (flour)</i>                                            | 82.3     | ND                          | Maize flour is mandatory      |
| <i>Spinach, cabbage and other green vegetables</i>              | 77.5     |                             |                               |
| <i>Sugar</i>                                                    | 77.3     | ND                          | Potential alternative vehicle |
| <i>Peas, beans, lentils and other pulses</i>                    | 70.8     |                             |                               |
| <i>Rice (husked)</i>                                            | 66.4     | ND                          | Potential alternative vehicle |
| <i>Tea dry</i>                                                  | 64.4     |                             |                               |
| <i>Fresh fish and seafood (including dagaa)</i>                 | 57.9     |                             |                               |
| <i>Beef including minced sausage</i>                            | 39.4     |                             |                               |
| <i>Mangoes, avocados and other fruits</i>                       | 34.5     |                             |                               |
| <i>Irish potatoes</i>                                           | 34.5     |                             |                               |
| <i>Buns, cakes and biscuits</i>                                 | 34.2     | WF: 98% IP                  | Wheat flour is mandatory      |
| <i>Coconuts (mature/immature)</i>                               | 32.7     |                             |                               |
| <i>Cooking bananas, plantains</i>                               | 30.3     |                             |                               |

\*As HH sample size was consistent across foods, the individual food sample sizes are not shown.

\*\*The GFDx only collects data for industrially processed maize flour, oil, rice, salt, and wheat flour. Source: Global Fortification Data Exchange. Chart: Quantity and Proportion of Industrially Processed Food Vehicles. Accessed 04/June/2019. [<http://www.fortificationdata.org>.]

Abbreviations: WF, wheat flour; IP, industrially processed; ND, no data

*Supplementary Table S2: Surveys where datasets were not accessible but verified to have consumption or expenditure data to describe reach*

| <b>Country</b>                             | <b>Survey name, year</b>                                                                                                                       | <b>Type of data</b> |
|--------------------------------------------|------------------------------------------------------------------------------------------------------------------------------------------------|---------------------|
| <i>Cambodia</i>                            | Cambodia Socio-Economic Survey 2014                                                                                                            | AC/E                |
| <i>Cameroon</i>                            | Cameroon Household Survey 2014<br>(Troisième Enquête Camerounaise auprès des Ménages)                                                          | AC/E                |
| <i>Côte d'Ivoire</i>                       | Household Living Standards Survey 2015<br>(Enquete Niveau de Vie des Ménages 2015)                                                             | AC/E                |
| <i>Djibouti</i>                            | Djibouti Family Health Survey 2012 (PAPFAM)<br>(Deuxieme Enquete Djiboutienne sur la Sante de la Famille PAPFAM 2012)                          | AC/E                |
| <i>eSwatini</i>                            | Swaziland Household Income and Expenditure Survey 2009-2010                                                                                    | AC/E                |
| <i>eSwatini</i>                            | Swaziland National Nutrition Survey 2008                                                                                                       | C                   |
| <i>Indonesia</i>                           | Indonesia National Socioeconomic Survey 2017 (SUSENAS)<br>Survei Sosial Ekonomi Nasional (SUSENAS)                                             | AC/E                |
| <i>Indonesia</i>                           | Total Diet Survey 2015                                                                                                                         | C                   |
| <i>Kenya</i>                               | Kenya National Micronutrient Survey 2011                                                                                                       | C                   |
| <i>Laos</i>                                | Laos Expenditure and Consumption Survey 2007-2008                                                                                              | AC/E                |
| <i>Lesotho</i>                             | Household Budget Survey 2002-2003                                                                                                              | AC/E                |
| <i>Liberia</i>                             | Liberia Comprehensive Food Security and Nutrition Survey (CFSNS) 2013                                                                          | AC/E                |
| <i>Mauritania</i>                          | Mauritania Continuous Household Living Conditions Survey 2014<br>(Enquete permanente sur les conditions de vie des Ménages 2004 (EPCV))        | AC/E                |
| <i>Micronesia,<br/>Federated States of</i> | Micronesia Household Income and Expenditure Survey 2013-2014                                                                                   | AC/E                |
| <i>Mongolia</i>                            | Mongolia National Nutrition Survey 2017                                                                                                        | C                   |
| <i>Morocco</i>                             | Morocco National Household Consumption and Expenditure Survey 2013-2014<br>(Enquête nationale sur la consommation et les dépenses des ménages) | AC/E                |
| <i>Nepal</i>                               | Nepal Living Standards Measurement Survey 2010-2011                                                                                            | AC/E                |
| <i>Nepal</i>                               | Nepal Micronutrient Status Survey 2016                                                                                                         | C                   |
| <i>Nicaragua</i>                           | Nicaragua Living Standards Measurement Survey 2014<br>(Encuesta Nacional de Hogares sobre Medición de Nivel de Vida 2014)                      |                     |
| <i>Nigeria</i>                             | Nigeria Food Consumption and Nutrition Survey 2001-2003                                                                                        | C                   |
| <i>Pakistan</i>                            | Pakistan National Nutrition Survey 2011                                                                                                        | C                   |
| <i>Pakistan</i>                            | Pakistan Integrated Household Survey 2001-2002                                                                                                 | AC/E                |
| <i>Philippines</i>                         | National Nutrition Survey 2013                                                                                                                 | C                   |
| <i>Sierra Leone</i>                        | Sierra Leone National Nutrition Survey 2017                                                                                                    | C                   |
| <i>Somalia</i>                             | Somalia National Micronutrient and Anthropometric Survey 2009                                                                                  | C                   |
| <i>Sri Lanka</i>                           | Household Income and Expenditure Survey 2016                                                                                                   | AC/E                |
| <i>Syrian, Arab<br/>Republic</i>           | Household Income and Expenditure Survey 2008-2009                                                                                              | AC/E                |
| <i>Tajikistan</i>                          | Tajikistan Micronutrient Status Survey 2016                                                                                                    | C                   |
| <i>Timor-Leste</i>                         | Timor-Leste Food and Nutrition Survey 2013                                                                                                     | C                   |
| <i>Timor-Leste</i>                         | Household Income and Expenditure Survey 2011                                                                                                   | AC/E                |
| <i>Uzbekistan</i>                          | Household Budget Survey 2003                                                                                                                   | AC/E                |
| <i>Vanuatu</i>                             | Vanuatu Household Income and Expenditure Survey 2010                                                                                           | AC/E                |
| <i>Vietnam</i>                             | Vietnam Living Standards Measurement Survey 2012                                                                                               | AC/E                |
| <i>Vietnam</i>                             | Vietnam General Nutrition Survey 2009-2010                                                                                                     | C                   |
| <i>Yemen</i>                               | Yemen Household Budget Survey 2005-2006                                                                                                        | AC/E                |
| <i>Zambia</i>                              | 2015 Living Conditions Monitoring Survey (LCMS)                                                                                                | AC/E                |
| <i>Zambia</i>                              | Food Consumption and Micronutrient Status Report 2014                                                                                          | C                   |
| <i>Zimbabwe</i>                            | Zimbabwe National Nutrition 2018                                                                                                               | AC/E                |

Type of data: AC/E, Apparent Consumption if consumption is collected through an income and expenditure survey; C, if consumption is collected using a dietary intake assessment tool

*Supplementary Table S3: LILMIC countries where consumption or expenditure data could not be confirmed (no report or survey tools to evaluate)*

| <b>Country</b>               | <b>Survey name, year</b>                                                                            |
|------------------------------|-----------------------------------------------------------------------------------------------------|
| <i>Angola</i>                | Angola National Nutrition Survey 2007<br>(Relatorio do Inquerito sobre a Nutrição em Angola 2007)   |
| <i>Comoros</i>               | Comoros Integrated Household Survey 2004<br>(Enquete Intégrale auprès des Ménages 2004)             |
| <i>Georgia</i>               | Georgia Living Conditions, Lifestyles and Health Study 2001-2002                                    |
| <i>Honduras</i>              | Honduras Multipurpose Household Survey, September 2006                                              |
| <i>Kyrgyzstan</i>            | Kyrgyzstan Living Conditions, Lifestyles and Health Study 2001-2002                                 |
| <i>Kyrgyzstan</i>            | Integrated Household Survey 2015                                                                    |
| <i>Lesotho</i>               | Lesotho Household Survey 2005                                                                       |
| <i>Lesotho</i>               | Lesotho National Nutrition Survey 2007                                                              |
| <i>Liberia</i>               | Liberia National Nutrition Survey 1999-2000                                                         |
| <i>Moldova</i>               | Moldova Living Conditions, Lifestyles and Health Study 2001-2002                                    |
| <i>Mozambique</i>            | Mozambique Micronutrient Survey 2012-2013                                                           |
| <i>Myanmar</i>               | Household Income and Expenditure Survey 2006                                                        |
| <i>Myanmar</i>               | Myanmar National Nutrition Survey 1997                                                              |
| <i>Sao Tome and Principe</i> | 2000 Housing Conditions Survey<br>(Pesquisa de Condições Habitacionais de São Tomé e Príncipe 2000) |
| <i>Tunisia</i>               | National Household Survey                                                                           |
| <i>Ukraine</i>               | Ukraine Living Conditions, Lifestyles and Health Study 2001-2002                                    |
| <i>Ukraine</i>               | Ukraine National Micronutrient Survey 2002                                                          |
| <i>Zimbabwe</i>              | Zimbabwe National Micronutrient Survey 1999                                                         |

*Supplementary Table S4: LILMIC countries with no surveys that may contain food consumption or expenditure data*

| <b>Country</b>           |
|--------------------------|
| Burkina Faso             |
| Cabo Verde               |
| Central African Republic |
| Chad                     |
| Congo, Dem. Rep.         |
| Congo, Rep.              |
| Eritrea                  |
| Guinea                   |
| Guinea-Bissau            |
| Haiti                    |
| Honduras                 |
| Kiribati                 |

**Supplementary Table S1: Studies by food category and outcomes: Dairy products (n=10)**

| <b>Efficacy outcomes</b>                                        |                                                               |                                                                                                                                                                                                                        |                                                                                                                                                                                                                                                                                                                                   |                                                                                                                                                                                                                                                                                                                                                                                                                                                                                                                                        |
|-----------------------------------------------------------------|---------------------------------------------------------------|------------------------------------------------------------------------------------------------------------------------------------------------------------------------------------------------------------------------|-----------------------------------------------------------------------------------------------------------------------------------------------------------------------------------------------------------------------------------------------------------------------------------------------------------------------------------|----------------------------------------------------------------------------------------------------------------------------------------------------------------------------------------------------------------------------------------------------------------------------------------------------------------------------------------------------------------------------------------------------------------------------------------------------------------------------------------------------------------------------------------|
| <i>Reference</i>                                                | <i>Food details</i>                                           | <i>FA dose, meal, study population</i>                                                                                                                                                                                 | <i>Outcomes measured</i>                                                                                                                                                                                                                                                                                                          | <i>Results</i>                                                                                                                                                                                                                                                                                                                                                                                                                                                                                                                         |
| Kelly et al., 1997                                              | Milk (low-fat)                                                | <ul style="list-style-type: none"> <li>200 µg/200 mL milk (single meal) + folic acid-free meal</li> <li>16 elderly patients (63-80 y) (no control/placebo)</li> </ul>                                                  | <ul style="list-style-type: none"> <li>Unmetabolized serum folic acid</li> <li>Serum folate Pre- and 2.25 hr post-meal</li> </ul>                                                                                                                                                                                                 | <ul style="list-style-type: none"> <li>Unmetabolized serum folic acid: no folic acid found in any subjects post-meal</li> <li>Serum folate: significant increase after meal</li> </ul>                                                                                                                                                                                                                                                                                                                                                 |
| Keane et al., 1998                                              | Milk                                                          | <ul style="list-style-type: none"> <li>38 µg/100 mL milk, daily; 6 mos</li> <li>FA: 49 patients (84 y, mean) from Saint James Hospital</li> <li>Control: 40 patients, two other institutions (81.9 y, mean)</li> </ul> | <ul style="list-style-type: none"> <li>Serum folate</li> <li>RBC folate</li> </ul>                                                                                                                                                                                                                                                | <ul style="list-style-type: none"> <li>Serum folate* (mean, 95% CI): FA: 5.81 (1.1– 17.6) µg/L Control: 2.16 (0.5–9.4) µg/L</li> <li>RBC folate*(mean, 95% CI): FA: 316.53 (130–905) µg/L Control: 196.11 (95–490) µg/L</li> </ul>                                                                                                                                                                                                                                                                                                     |
| Green et al., 2005                                              | Milk powder (Anmum™ brand)                                    | <ul style="list-style-type: none"> <li>375 µg/75g of milk powder daily (as 37.5g powder in 200ml water at morning and evening).</li> <li>73 female volunteers (36 FA, 37 control); 18-45 y, range</li> </ul>           | <ul style="list-style-type: none"> <li>Plasma folate</li> <li>Whole blood folate</li> <li>RBC folate</li> <li>Plasma total homocysteine</li> <li>Vitamin B12</li> </ul>                                                                                                                                                           | <ul style="list-style-type: none"> <li>Plasma folate* (mean Δ, 95% CI): Δ FA/control: 35 (30-41) nmol/L</li> <li>RBC folate* (mean Δ, 95% CI) Δ FA/control: 539 (436-641) nmol/L</li> <li>tHcy* (geo. mean, 95% CI): Ratio FA/control: 0.86 (0.79-0.94) µmol/L</li> </ul>                                                                                                                                                                                                                                                              |
| de Jong et al., 2005                                            | Milk (semi-skimmed; pasteurized and ultra-heat treated (UHT)) | <ul style="list-style-type: none"> <li>200 µg/500 mL of pasteurized (p) or UHT milk daily for 4 wks</li> <li>69 volunteers (35 FA, 34 control); 18-49 y, range</li> </ul>                                              | <ul style="list-style-type: none"> <li>Serum folate</li> <li>RBC folate</li> <li>Plasma homocysteine</li> </ul>                                                                                                                                                                                                                   | <ul style="list-style-type: none"> <li>Serum folate* (mean Δ, 95% CI): Δ UHT+FA/control: 7.0 (4.8-9.2) nmol/L Δ p+FA/control: 6.6 (5.1-8.1) nmol/L</li> <li>RBC folate* (mean Δ, 95% CI): Δ UHT+FA/control: 32 (10-55) nmol/L Δ p+FA/control: 36 (20-52) nmol/L</li> <li>tHcy* (mean Δ ± SD): Δ UHT+FA/control: -0.6 ± 1.0 µmol/L Δ p+FA/control: -0.6 ± 0.6 µmol/L</li> </ul>                                                                                                                                                         |
| <b>Food characteristics, sensory, and/or retention outcomes</b> |                                                               |                                                                                                                                                                                                                        |                                                                                                                                                                                                                                                                                                                                   |                                                                                                                                                                                                                                                                                                                                                                                                                                                                                                                                        |
| <i>Reference</i>                                                | <i>Food details</i>                                           | <i>FA dose, point of fortification, storage length, co-fortification</i>                                                                                                                                               | <i>Outcomes measured, storage and temperature</i>                                                                                                                                                                                                                                                                                 | <i>Results</i>                                                                                                                                                                                                                                                                                                                                                                                                                                                                                                                         |
| Achanta et al., 2007                                            | Milk (2%, pasteurized or non-pasteurized)                     | 100 µg, 200 µg, 300 µg, 400 µg (volume not stated)                                                                                                                                                                     | <ul style="list-style-type: none"> <li>Folic acid retention: 1, 7, 14, 21 d</li> <li>Color (L*a*b*)</li> <li>pH, viscosity, fat, protein</li> <li>9-point hedonic scale (1 = dislike extremely, 5 = neither dislike nor like, 9=like extremely) on overall acceptability, appearance, color, flavor, texture/mouthfeel</li> </ul> | <ul style="list-style-type: none"> <li>No significant losses after 21 d</li> <li>No significant effect on L* or a* values, but significant effect on b* values as folic acid levels increased (increasing yellowness)</li> <li>No significant effect of folic acid on pH, viscosity, fat, or protein</li> <li>No significant difference in acceptability scores in fortified milk before or after pasteurization. Mean flavor, appearance, and texture/mouthfeel scores were 7.75 or above, indicating consumer acceptance.</li> </ul> |

|                           |                                                                                     |                                                                                                                                                                                                                            |                                                                                                                                                                                                                                            |                                                                                                                                                                                                                                                                                                                                                                                                                                                                                                                                |
|---------------------------|-------------------------------------------------------------------------------------|----------------------------------------------------------------------------------------------------------------------------------------------------------------------------------------------------------------------------|--------------------------------------------------------------------------------------------------------------------------------------------------------------------------------------------------------------------------------------------|--------------------------------------------------------------------------------------------------------------------------------------------------------------------------------------------------------------------------------------------------------------------------------------------------------------------------------------------------------------------------------------------------------------------------------------------------------------------------------------------------------------------------------|
| Aryana, 2003              | Yogurt (fat-free, sugar-free, plain)                                                | 0 µg /cup, 75 µg/cup, or 150 µg/cup: <ul style="list-style-type: none"> <li>before pasteurization</li> <li>after pasteurization</li> <li>evaluated 4 days after manufacturing</li> <li>3 replications conducted</li> </ul> | <ul style="list-style-type: none"> <li>Color (L*a*b* and L*C*h), pH, titratable acidity (TA), viscosity</li> <li>Flavor and texture evaluation contest</li> </ul>                                                                          | <ul style="list-style-type: none"> <li>Lightness (L*), yellow (b*), and redness (a*) increased after fortification</li> <li>Chroma (C*) increased and hue angles (h*) closer to yellow after fortification</li> <li>pH and TA not affected by fortification</li> <li>Significant reduction in flavor scores (150 µg/cup)</li> <li>Significantly lower sensory body and texture scores after fortification (weak body, graininess)</li> <li>Lower viscosity/increased whey release (150 µg/cup) after pasteurization</li> </ul> |
| Boeneke et al., 2007      | Yogurt (fat-free, lemon flavored)                                                   | 0 µg/224 mL, 167 µg/224 mL, 335 µg/224 mL, 503 µg/224 mL, 670 µg/224 mL: <ul style="list-style-type: none"> <li>before pasteurization</li> <li>after pasteurization</li> <li>3 replications conducted</li> </ul>           | <ul style="list-style-type: none"> <li>Folic acid retention at weeks 1, 5</li> <li>Protein, moisture, ash, fat at week 1</li> <li>Viscosity, pH, syneresis, L*a*b*, and flavor and texture at weeks 1, 3, 5</li> </ul>                     | <ul style="list-style-type: none"> <li>No significant difference in retention due to pasteurization</li> <li>Lower folic acid retention at higher addition levels at 5 wks</li> <li>No differences in protein, fat, moisture, ash, viscosity, syneresis, body and texture scores, lightness (L*)</li> <li>Significant differences in redness (a*) and yellowness (b*) after fortification</li> <li>Significant decreasing flavor scores after fortification</li> </ul>                                                         |
| Perez-Esteve et al., 2016 | Yogurt (low fat and full fat; stirred)                                              | 360 µg/125 g                                                                                                                                                                                                               | L*a*b, and rheological properties at day 0, 7, 21. Samples stored at 4°C in between analysis                                                                                                                                               | Significant effects of fortification on color (L*, a*, b*, C*, h*) but none on pH, syneresis, any rheological properties. Interactions between fortification and storage with color (b*, h*)                                                                                                                                                                                                                                                                                                                                   |
| Gaur et al., 2018         | Traditional Indian Yogurt-Based Drink ( <i>chhansh</i> )                            | 27 µg/250 mL<br><br>Co-fortified with vitamin A, vitamin D, iron (ferric pyrophosphate), zinc, iodine                                                                                                                      | Measured at days 1, 2, 3, 6 and 4°, 23°, 40°C: <ul style="list-style-type: none"> <li>pH, titratable acidity, color (ΔE as measured by L*a*b*), viscosity</li> <li>Triangle sensory test: students, mothers with young children</li> </ul> | <ul style="list-style-type: none"> <li>No effect on pH or TA due to fortification</li> <li>Significantly different ΔE (perceptible by human eyes) after fortification</li> <li>No effect on viscosity due to fortification after six days of storage</li> <li>Students and mothers with young children unable to differentiate fortified samples from controls in color, smell, or taste</li> </ul>                                                                                                                            |
| N. de Jong et al., 2000   | Vanilla custard, vanilla-mixed fruit quark, strawberry yogurt, vanilla-apple yogurt | 130 µg/100 g of dairy product<br>Co-fortified with B1, B2, B6, B12, C, D, E, zinc, iodine, calcium, iron, magnesium                                                                                                        | Folic acid retention at day 1 and day 14, samples stored at 4-5°C during days 1-13                                                                                                                                                         | No significant losses related to storage over 13 days                                                                                                                                                                                                                                                                                                                                                                                                                                                                          |

**Supplementary Table S6: Studies by food category and outcomes: Condiments/spread (n=7)**

| <b>Efficacy outcomes</b>                                        |                                                                                                         |                                                                                                                                                                                       |                                                                                                                                                                                                                                                                                            |                                                                                                                                                                                                                                                                                                                                                                                                                                  |
|-----------------------------------------------------------------|---------------------------------------------------------------------------------------------------------|---------------------------------------------------------------------------------------------------------------------------------------------------------------------------------------|--------------------------------------------------------------------------------------------------------------------------------------------------------------------------------------------------------------------------------------------------------------------------------------------|----------------------------------------------------------------------------------------------------------------------------------------------------------------------------------------------------------------------------------------------------------------------------------------------------------------------------------------------------------------------------------------------------------------------------------|
| <i>Reference</i>                                                | <i>Food details</i>                                                                                     | <i>FA dose, meal, study population</i>                                                                                                                                                | <i>Outcomes measured</i>                                                                                                                                                                                                                                                                   | <i>Results</i>                                                                                                                                                                                                                                                                                                                                                                                                                   |
| Pentieva et al., 2003                                           | Low-fat spread (produced by Unilever, which tested the product for shelf-life stability up to 3 months) | 200 µg/20 g with a low-folate breakfast; followed by morning snack, lunch, and afternoon snack (single meal)<br>13 male volunteers, 31.6 ± 12.2 y (crossover study design)            | Plasma folate at 0.5, 1, 1.5, 2, 2.5, 3, 5, 7 and 10h post-meal                                                                                                                                                                                                                            | Plasma folate concentrations significantly increased for up to 7 h after consumption. However, FA delivered through a spread was less effective than through a tablet: the area under the plasma folate response curve was 67% of an equivalent FA dose in tablet form                                                                                                                                                           |
| <b>Food characteristics, sensory, and/or retention outcomes</b> |                                                                                                         |                                                                                                                                                                                       |                                                                                                                                                                                                                                                                                            |                                                                                                                                                                                                                                                                                                                                                                                                                                  |
| <i>Reference</i>                                                | <i>Food details</i>                                                                                     | <i>FA dose, point of fortification, storage length, co-fortification</i>                                                                                                              | <i>Outcomes measured, storage and temperature</i>                                                                                                                                                                                                                                          | <i>Results</i>                                                                                                                                                                                                                                                                                                                                                                                                                   |
| Vinodkumar et al., 2009b                                        | Salt                                                                                                    | 50 µg/10 g/day, through regular dietary intake in residential school meals by school children for 1 yr<br><br>Co-fortified with vitamin A, B1, B2, B3, B6, B12, calcium, iron, iodine | <ul style="list-style-type: none"> <li>Folic acid retention after storage at 30°C and 45% humidity for 6 months. Measurements taken at 0, 2, 4 and 6 mos</li> <li>Folic acid retention after cooking: salt added to sambar (lentil soup), cooked for 20 min</li> <li>Salt color</li> </ul> | <ul style="list-style-type: none"> <li>0.6% loss in folic acid after 6 mos</li> <li>0.2% loss in folic acid after cooking</li> <li>Without vitamin B2, the salt was almost as white as the color of raw salt. However, when vitamin B2 was added, buff-colored specks were seen in the salt</li> </ul> <p>*Efficacy outcomes and results not reported here due to co-fortification with nutrients. Blood folate not measured</p> |
| Vinodkumar et al., 2009a                                        | Salt                                                                                                    | 100 µg/10g/day, through regular dietary intake in residential school meals by school children for 9 mos<br><br>Co-fortified with vitamin A, B1, B2, B3, B6, B12, iron, iodine, zinc   | Folic acid retention after storage at 30°C and 45% humidity for 10 months                                                                                                                                                                                                                  | <ul style="list-style-type: none"> <li>8.12% loss in folic acid after 10 mos</li> </ul> <p>*Efficacy outcomes and results not reported here due to co-fortification with nutrients. Blood folate (serum) measured</p>                                                                                                                                                                                                            |
| Sangakkara, 2011                                                | Salt                                                                                                    | 90 mg/kg; refined salt (buffer solutions at 9 or 10 pH); coarse, impure (grey-brown) salt (buffer solution at 9 pH)<br><br>Co-fortified with iodine                                   | <ul style="list-style-type: none"> <li>Color (visual observation)</li> <li>Folic acid retention in dark storage, 45°C, 60% humidity: 6 mos (refined) or 4 mos (coarse)</li> </ul>                                                                                                          | <p>"The appearance of the salt turns into a pale yellow upon spraying the solutions"</p> <ul style="list-style-type: none"> <li>6 mos, refined salt: 95% retention</li> <li>4 mos, coarse salt: 95% retention</li> </ul>                                                                                                                                                                                                         |
| Li et al., 2011                                                 | Salt                                                                                                    | 20 mg/kg; several samples created with differing technology: <ul style="list-style-type: none"> <li>Direct powder blending</li> <li>Spray as aqueous solution</li> </ul>              | <ul style="list-style-type: none"> <li>Folic acid retention after storage at 45°C and 60% humidity, measured at 0, 1, 2, 3, and 9 mos</li> </ul>                                                                                                                                           | <p>Salt: Retention across samples ranged from 80.9%-95.7% after 9 mos</p> <p>Sugar: Retention across samples ranged from 50.3%-101.6% after 9 mos</p>                                                                                                                                                                                                                                                                            |

|                    |       |                                                                                                                                                                                                                                                                                                                                                                                                                                                                                                                                                 |                                                                                                                                                                                                                                                                                                                                                                                                                                                                                                                                                                     |                                                                                                                                                                                                                                                                                                                                                                                                                                                                                                                                                                                                                                       |
|--------------------|-------|-------------------------------------------------------------------------------------------------------------------------------------------------------------------------------------------------------------------------------------------------------------------------------------------------------------------------------------------------------------------------------------------------------------------------------------------------------------------------------------------------------------------------------------------------|---------------------------------------------------------------------------------------------------------------------------------------------------------------------------------------------------------------------------------------------------------------------------------------------------------------------------------------------------------------------------------------------------------------------------------------------------------------------------------------------------------------------------------------------------------------------|---------------------------------------------------------------------------------------------------------------------------------------------------------------------------------------------------------------------------------------------------------------------------------------------------------------------------------------------------------------------------------------------------------------------------------------------------------------------------------------------------------------------------------------------------------------------------------------------------------------------------------------|
|                    | Sugar | <ul style="list-style-type: none"> <li>Premix extrusion and blending</li> </ul> <p>3 samples: no co-fortification, co-fortified with iodine, co-fortified with iron + iodine</p> <p>20 mg/kg; several samples created with differing technology:</p> <ul style="list-style-type: none"> <li>Direct powder blending</li> <li>Spray as aqueous solution</li> <li>Premix extrusion and blending</li> <li>Spray as oil suspension</li> </ul> <p>3 samples: no co-fortification, co-fortified with vitamin A, co-fortified with iron + vitamin A</p> | <ul style="list-style-type: none"> <li>Color and physical properties during 9 mos storage (visual observation)</li> </ul>                                                                                                                                                                                                                                                                                                                                                                                                                                           | <p>“Most salt and sugar samples were not visibly changed in appearance when stored at high temperature and relative humidity.</p> <p>When the samples were prepared by spraying the same amount of folic acid solution, the sugar sample was more likely to stick together than the salt sample.</p> <p>Folic acid premixes with matching particle sizes to sugar and salt grains remained essentially visibly indistinguishable in the systems, even after 9 months of storage.”</p>                                                                                                                                                 |
| McGee, 2012        | Salt  | <p>30 mg/kg</p> <p>Several samples created: no co-fortification (FA only), co-fortified with iodine, iron (encapsulated or not), or iodine and iron (encapsulated or not)</p>                                                                                                                                                                                                                                                                                                                                                                   | <p>Folic acid retention after 1 year of storage</p>                                                                                                                                                                                                                                                                                                                                                                                                                                                                                                                 | <p>FA only: 105% ± 6%</p> <p>FA+iodine: 101% ± 6%</p> <p>FA+iodine+iron: ~68% (graph estimate)</p> <p>FA+iodine+encapsulated iron: 76%± 7%</p> <p>FA+iron: ~55% (graph estimate)</p> <p>FA+encapsulated iron: ~63% (graph estimate)</p>                                                                                                                                                                                                                                                                                                                                                                                               |
| McGee et al., 2017 | Salt  | <p>3 sets of samples (multiple sample types within a set, with differing weight per volume amounts of micronutrients, buffer solutions, and/or salt origins [Canada or Orissa, India]):</p> <ul style="list-style-type: none"> <li>10 mg/kg (coarse salt) Co-fortified with iodine</li> <li>45 mg/kg Co-fortified with iodine</li> <li>50 mg/kg Co-fortified with iodine</li> </ul>                                                                                                                                                             | <p>10 mg/kg:</p> <ul style="list-style-type: none"> <li>Color analysis (HSV color space) at production</li> </ul> <p>45 mg/kg:</p> <ul style="list-style-type: none"> <li>Folic acid retention after storage at 45°C and 60% humidity, measured at 0, 4 mos</li> </ul> <p>50 mg/kg:</p> <ul style="list-style-type: none"> <li>Folic acid retention after storage at ~25°C, measured at 0, 12 mos</li> <li>Folic acid retention after storage at ~25°C and 45°C, with fluctuating humidity (20%-60%) measured at 0, 20 mos</li> <li>Color analysis (HSV)</li> </ul> | <ul style="list-style-type: none"> <li>At production: Uneven yellowing due to uneven folic acid dispersion amongst larger crystals</li> <li>Folic acid retention after 4 mos ranged from 87%-96%</li> <li>Folic acid retention: <ul style="list-style-type: none"> <li>~25°C, 12 mos: &gt;80%</li> <li>~25°C, 20 mos: &gt;60%</li> <li>45°C, 20 mos: &gt;55%</li> </ul> </li> <li>Color analysis: <ul style="list-style-type: none"> <li>0 mo: pale yellow, uniform (hue=58.0°)</li> <li>~25°C, 20 mos: pale yellow, uniform (hue=49°)</li> <li>45°C, 20 mos, fluctuating humidity: pinkish, uniform (hue=29°)</li> </ul> </li> </ul> |



**Supplementary Table S7: Studies by food category and outcomes: Beverages (n=7)**

| <b>Food characteristics, sensory, and/or retention outcomes</b> |                                                                                                                              |                                                                          |                                                                                                                                                                                                                                                        |                                                                                                                                                                                                                                                                                                                                                                                                                                                                                                                                                                                                                                                                                                                                                                                                                                                                                                                                                                                                                                                                                                                                                                                                                           |
|-----------------------------------------------------------------|------------------------------------------------------------------------------------------------------------------------------|--------------------------------------------------------------------------|--------------------------------------------------------------------------------------------------------------------------------------------------------------------------------------------------------------------------------------------------------|---------------------------------------------------------------------------------------------------------------------------------------------------------------------------------------------------------------------------------------------------------------------------------------------------------------------------------------------------------------------------------------------------------------------------------------------------------------------------------------------------------------------------------------------------------------------------------------------------------------------------------------------------------------------------------------------------------------------------------------------------------------------------------------------------------------------------------------------------------------------------------------------------------------------------------------------------------------------------------------------------------------------------------------------------------------------------------------------------------------------------------------------------------------------------------------------------------------------------|
| <i>Reference</i>                                                | <i>Food details</i>                                                                                                          | <i>FA dose, point of fortification, storage length, co-fortification</i> | <i>Outcomes measured, storage and temperature</i>                                                                                                                                                                                                      | <i>Results</i>                                                                                                                                                                                                                                                                                                                                                                                                                                                                                                                                                                                                                                                                                                                                                                                                                                                                                                                                                                                                                                                                                                                                                                                                            |
| Öhrvik et al., 2008                                             | Orange juice                                                                                                                 | 0.4 mg/kg<br>0.6 mg/kg                                                   | Folic acid retention at day 1, 21, 35 (best before date)                                                                                                                                                                                               | No significant differences in folic acid concentrations between day 1, 21, and 35                                                                                                                                                                                                                                                                                                                                                                                                                                                                                                                                                                                                                                                                                                                                                                                                                                                                                                                                                                                                                                                                                                                                         |
|                                                                 |                                                                                                                              | Co-fortified with iron                                                   |                                                                                                                                                                                                                                                        |                                                                                                                                                                                                                                                                                                                                                                                                                                                                                                                                                                                                                                                                                                                                                                                                                                                                                                                                                                                                                                                                                                                                                                                                                           |
| Rivas et al., 2007                                              | Mixed orange juice (50%) and UHT skim milk (20%) beverage, with water (30%), sugar (7.5%), citric acid (0.1%), pectin (0.3%) | 1,283.5 mg/kg<br><br>Co-fortified with vitamins B2, B5, B7               | <ul style="list-style-type: none"> <li>Folic acid retention using non-thermal preservation and thermal pasteurization (84°C and 95°C at 15–120 seconds)</li> <li>Folic acid retention at 81 days, 4°C</li> </ul>                                       | <ul style="list-style-type: none"> <li>No significant differences in folic acid concentrations using non-thermal preservation or using thermal pasteurization at 84°C</li> <li>At 95°C, folic acid losses ~10% (graph estimate)</li> <li>Folic acid retention 28%-36% after 15 days, constant for the rest of the storage period.</li> </ul>                                                                                                                                                                                                                                                                                                                                                                                                                                                                                                                                                                                                                                                                                                                                                                                                                                                                              |
| Ruiz-Rico et al., 2017                                          | Apple juice<br>Orange juice                                                                                                  | 4 mg encapsulated FA (eFA)/10 mL<br>0.3 mg/10 mL (free FA)               | <ul style="list-style-type: none"> <li>Folic acid retention under 121°C, 1 bar, for 5, 10, 15 mins</li> <li>Folic acid retention under visible and ultraviolet lamps for 16, 18, 20, 22, 24 h</li> <li>Folic acid retention at 28 days, 4°C</li> </ul> | <p>121°C, 1 bar</p> <p><u>Apple juice:</u></p> <ul style="list-style-type: none"> <li>eFA: 70%-80% retention (graph estimate)</li> <li>free FA: 58%-66% retention</li> </ul> <p><u>Orange juice:</u></p> <ul style="list-style-type: none"> <li>eFA: 81-91% retention</li> <li>free FA: 81-85% retention</li> </ul> <p>Visible light treatment after 24 hours:</p> <p><u>Apple juice</u></p> <ul style="list-style-type: none"> <li>eFA: 81-91% retention / free FA: 24% retention</li> </ul> <p><u>Orange juice</u></p> <ul style="list-style-type: none"> <li>eFA: No significant losses</li> <li>free FA: No significant losses</li> </ul> <p>Ultraviolet light treatment after 24 hours:</p> <p><u>Apple juice</u></p> <ul style="list-style-type: none"> <li>eFA: 44% retention / free FA: 36% retention</li> </ul> <p><u>Orange juice</u></p> <ul style="list-style-type: none"> <li>eFA: 73% retention / free FA: 83% retention</li> </ul> <p>28 days, 4°C:</p> <p><u>Apple juice</u></p> <ul style="list-style-type: none"> <li>eFA: 100% retention / free FA: 77% retention</li> </ul> <p><u>Orange juice</u></p> <ul style="list-style-type: none"> <li>eFA: 100% retention / free FA: 80% retention</li> </ul> |

|                         |                                                                                                        |                                                                                                                                                          |                                                                                                                                                                                                                |                                                                                                                                                                                                                                                                                                                                                  |
|-------------------------|--------------------------------------------------------------------------------------------------------|----------------------------------------------------------------------------------------------------------------------------------------------------------|----------------------------------------------------------------------------------------------------------------------------------------------------------------------------------------------------------------|--------------------------------------------------------------------------------------------------------------------------------------------------------------------------------------------------------------------------------------------------------------------------------------------------------------------------------------------------|
| Frommherz et al., 2014  | Commonly sold vitamin juices (n=9) (no description of juice content)                                   | <p>Label claims:<br/>100 µg/100 mL for 8 juices<br/>60 µg/100 mL for 1 juice</p> <p>Actual folic acid content (average):<br/>186.0 ± 33.6 µg//100 mL</p> | <ul style="list-style-type: none"> <li>Folic acid retention after 12 mos, 18°C</li> <li>Folic acid retention after 12 mos, 18°C, 500=lux for 10 h/day</li> </ul>                                               | <ul style="list-style-type: none"> <li>Average loss of 81 µg/100 ml (46%) over the course of the entire study</li> <li>Average loss of 87 µg/100 ml (50%) over the course of the entire study</li> </ul> <p>*Juices were overfortified by on average 89%, such that by 12 mos, juices were still +4% or -8% below the label's nutrient claim</p> |
| Kida et al., 2018       | Acidic beverage (no further description)                                                               | <p>3.16 mg/L</p> <p>Fortified with varying levels of ethanol (0%, 0.05%, 0.1%, 0.3%, 0.5%, and 1%)</p>                                                   | <ul style="list-style-type: none"> <li>Folic acid retention at 6 days, 50°C</li> <li>Analysis of drink ingredient components affecting Folic acid retention at 13 days, 50°C</li> </ul>                        | <ul style="list-style-type: none"> <li>6 days: Folic acid retention declined and plateaued with increasing ethanol levels (90% at 0% ethanol and 55% at 1% ethanol)</li> <li>13 days: Flavor #3 affected folic acid retention the most (22.7%), while nicotinamide the least (65.1%)</li> </ul>                                                  |
| N. de Jong et al., 2000 | Multiple fruit juices: orange-peach juice, apple-berry-grape juice, apple compote, apple-peach compote | <p>130 µg/100 g of dairy product</p> <p>Co-fortified with vitamins B1, B2, B6, B12, C, zinc, iodine, calcium, iron, magnesium</p>                        | <ul style="list-style-type: none"> <li>Folic acid retention at day 1 and day 14, samples stored at 4-5°C during days 1-13</li> <li>Samples measured by two different labs, during different seasons</li> </ul> | No significant losses related to storage over 13 days, although nutrient content both at day 1 and day 14 were related to the type of fruit juice                                                                                                                                                                                                |
| Tapola et al., 2004     | Mineral water                                                                                          | <p>563 µg/750 mL</p> <p>Co-fortified with vitamin B6, B12, D, calcium</p>                                                                                | Folic acid retention after 6 mos                                                                                                                                                                               | <p>60% retention after 6 mos</p> <p>*Efficacy outcomes and results not reported here due to co-fortification with nutrients. Serum folate and RBC folate measured</p>                                                                                                                                                                            |

**Supplementary Table S8: Studies by food category and outcomes: Meat and eggs (n=6)**

| <b>Food characteristics, sensory, and/or retention outcomes</b> |                                                                      |                                                                          |                                                                                                                                                                                                                                                                                                                                                                                                                                                                                                                                                                                                                                                                                                                |                                                                                                                                                                                                                                                                                                                                                                                                                                                                                                                                                                                                        |
|-----------------------------------------------------------------|----------------------------------------------------------------------|--------------------------------------------------------------------------|----------------------------------------------------------------------------------------------------------------------------------------------------------------------------------------------------------------------------------------------------------------------------------------------------------------------------------------------------------------------------------------------------------------------------------------------------------------------------------------------------------------------------------------------------------------------------------------------------------------------------------------------------------------------------------------------------------------|--------------------------------------------------------------------------------------------------------------------------------------------------------------------------------------------------------------------------------------------------------------------------------------------------------------------------------------------------------------------------------------------------------------------------------------------------------------------------------------------------------------------------------------------------------------------------------------------------------|
| <i>Reference</i>                                                | <i>Food details</i>                                                  | <i>FA dose, point of fortification, storage length, co-fortification</i> | <i>Outcomes measured, storage and temperature</i>                                                                                                                                                                                                                                                                                                                                                                                                                                                                                                                                                                                                                                                              | <i>Results</i>                                                                                                                                                                                                                                                                                                                                                                                                                                                                                                                                                                                         |
| House et al., 2002                                              | Chicken eggs                                                         | 40-50 µg/egg, fortification through enriched hen feed                    | Folic acid retention at 4°C, on days 0, 7, 14, 21, 28                                                                                                                                                                                                                                                                                                                                                                                                                                                                                                                                                                                                                                                          | No significant nutrient losses during storage                                                                                                                                                                                                                                                                                                                                                                                                                                                                                                                                                          |
| Altic et al., 2016                                              | Chicken eggs                                                         | 1.23 mg/kg, fortification through enriched hen feed                      | <ul style="list-style-type: none"> <li>Folic acid retention at 4-7°C, on days 1, 7, 14, 21, 17</li> <li>Folic acid retention at 18-20°C, on days 1, 7, 14, 21, 17</li> <li>Folic acid retention after cooking via: boiling, poaching, frying, scrambling at 2 time points for each method (50 s or 2 min)</li> </ul>                                                                                                                                                                                                                                                                                                                                                                                           | <ul style="list-style-type: none"> <li>No significant differences in nutrient content during storage, regardless of temperature</li> <li>No significant differences in nutrient content during cooking, regardless of method or cooking time</li> </ul>                                                                                                                                                                                                                                                                                                                                                |
| Galán et al., 2010                                              | Hamburgers (fresh beef meat)                                         | 6, 12, or 24 mg/kg                                                       | <ul style="list-style-type: none"> <li>Folic acid retention after meat irradiation treatment</li> <li>Folic acid retention after cooking</li> <li>Texture Profile Analysis (TPA): hardness, springiness, cohesiveness, gumminess and chewiness</li> <li>Shear Analysis: shear force and work of shearing</li> <li>Color: L*a*b*, hue angle, saturation index</li> <li>Acceptability, measured via:<br/> <u>Descriptive</u>: 10-point hedonic scale (0 = dislike extremely and 10 = like extremely) to evaluate raw hamburgers (odor, color and overall acceptability) and of cooked ones (dour, color, texture, taste and over- all acceptability).<br/> <u>Preferential</u>: method not described </li> </ul> | <ul style="list-style-type: none"> <li>Irradiation treatment caused a 20-30% decrease in FA</li> <li>No significant losses in folic acid after cooking</li> <li>No effect from FA on TPA or Shear Analysis parameters</li> <li>Significantly lower b* (yellow) values in raw FA hamburgers compared to non-fortified, and increased red color in raw FA hamburgers (decrease in hue angle and increase in saturation index)</li> <li>No effect from FA on color with cooked hamburgers</li> <li>FA did not affect any acceptability parameters in the descriptive test or preferential test</li> </ul> |
| Galán et al., 2011b                                             | Fermented dry ready to-eat sausages (reduced-fat <i>salchichón</i> ) | 6, 12, or 24 mg/kg                                                       | <ul style="list-style-type: none"> <li>Folic acid retention after meat irradiation treatment</li> <li>Folic acid retention after cooking</li> <li>Texture Profile Analysis (TPA): hardness, springiness, cohesiveness, gumminess and chewiness</li> </ul>                                                                                                                                                                                                                                                                                                                                                                                                                                                      | <ul style="list-style-type: none"> <li>Irradiation treatment caused a 15-29% decrease in FA</li> <li>No significant losses in folic acid after cooking</li> <li>Significantly higher hardness, shear force, and work of shearing values in 1.2</li> </ul>                                                                                                                                                                                                                                                                                                                                              |

|                     |                                                                                                      |                    |                                                                                                                                                                                                                                                                                                                                                                                                                                                                                                                                                                                                                                                                              |                                                                                                                                                                                                                                                                                                                                                                                                                                                                  |
|---------------------|------------------------------------------------------------------------------------------------------|--------------------|------------------------------------------------------------------------------------------------------------------------------------------------------------------------------------------------------------------------------------------------------------------------------------------------------------------------------------------------------------------------------------------------------------------------------------------------------------------------------------------------------------------------------------------------------------------------------------------------------------------------------------------------------------------------------|------------------------------------------------------------------------------------------------------------------------------------------------------------------------------------------------------------------------------------------------------------------------------------------------------------------------------------------------------------------------------------------------------------------------------------------------------------------|
|                     |                                                                                                      |                    | <ul style="list-style-type: none"> <li>• Shear Analysis: shear force and work of shearing</li> <li>• Color: L*a*b*, hue angle, saturation index</li> <li>• Acceptability, measured via:<br/><u>Descriptive</u>: 10-point hedonic scale (0 = dislike extremely and 10 = like extremely) to odor, color, texture, taste and overall acceptability<br/><u>Preferential</u>: tasters asked to rank four samples: 1 = worst, 4 = best</li> </ul>                                                                                                                                                                                                                                  | <p>mg and 2.4 mg FA sausages compared to control and 0.6 mg FA sausages</p> <ul style="list-style-type: none"> <li>• L* and a* values not affected by FA, b* values “minimally” affected by FA.</li> <li>• FA did not affect any acceptability parameters in the descriptive test or preferential test</li> </ul>                                                                                                                                                |
| Galán et al., 2011a | Cooked sausages ( <i>mortadella</i> )                                                                | 6, 12, or 24 mg/kg | <ul style="list-style-type: none"> <li>• Folic acid retention after meat irradiation treatment</li> <li>• Folic acid retention after cooking</li> <li>• Texture Profile Analysis (TPA): hardness, springiness, cohesiveness, gumminess and chewiness</li> <li>• Shear Analysis: shear force and work of shearing</li> <li>• Color: L*a*b*, hue angle, saturation index</li> <li>• Acceptability, measured via:<br/><u>Descriptive</u>: 10-point hedonic scale (0 = dislike extremely and 10 = like extremely) to evaluate odor, color, texture, taste, and overall acceptability<br/><u>Preferential</u>: tasters asked to rank four samples: 1 = worst, 4 = best</li> </ul> | <ul style="list-style-type: none"> <li>• Irradiation treatment caused 30% decrease in FA</li> <li>• No significant losses in folic acid after cooking</li> <li>• No effect from FA on TPA or Shear Analysis parameters</li> <li>• Significantly higher lightness (L*), decrease in redness (a*) and increase in yellowness (b*) in FA sausage.</li> <li>• FA did not affect any acceptability parameters in the descriptive test or preferential test</li> </ul> |
| Galán et al., 2013  | Fresh hamburger, cooked sausages ( <i>mortadella</i> ), dry fermented sausages ( <i>salchichón</i> ) | 24 mg/kg           | <ul style="list-style-type: none"> <li>• Folic acid retention after irradiation</li> <li>• Folic acid retention in storage for 60, 90 d</li> <li>• Acceptability of meat products, at d 0, 60, and 90 d, using a descriptive test: 10-point hedonic scale (0 = dislike extremely and 10 = like extremely) to evaluate odor, color, texture, and taste</li> </ul>                                                                                                                                                                                                                                                                                                             | <ul style="list-style-type: none"> <li>• Irradiation treatment caused 15-30% decrease in FA</li> <li>• No significant losses in folic acid after 90 d in storage, except for non-irradiated <i>salchichón</i>, with 20% losses</li> <li>• FA did not affect any acceptability parameters in the descriptive test at 60 or 90 d</li> </ul>                                                                                                                        |

**Supplementary Table S9: Studies by food category and outcomes: Fruit, cereal grains, candy (n=5)**

| <b>Food characteristics, sensory, and/or retention outcomes</b> |                         |                                                                                                                                                                                                        |                                                                                                                                                                                                                                                                                                                                                                                                                                                                                                  |                                                                                                                                                                                                                                                                                                                                                                                                                                       |
|-----------------------------------------------------------------|-------------------------|--------------------------------------------------------------------------------------------------------------------------------------------------------------------------------------------------------|--------------------------------------------------------------------------------------------------------------------------------------------------------------------------------------------------------------------------------------------------------------------------------------------------------------------------------------------------------------------------------------------------------------------------------------------------------------------------------------------------|---------------------------------------------------------------------------------------------------------------------------------------------------------------------------------------------------------------------------------------------------------------------------------------------------------------------------------------------------------------------------------------------------------------------------------------|
| <i>Reference</i>                                                | <i>Food details</i>     | <i>FA dose, point of fortification, storage length, co-fortification</i>                                                                                                                               | <i>Outcomes measured, storage and temperature</i>                                                                                                                                                                                                                                                                                                                                                                                                                                                | <i>Results</i>                                                                                                                                                                                                                                                                                                                                                                                                                        |
| Peña C et al., 2013                                             | Cape gooseberry (fresh) | 20% of daily recommended value/200 g<br><br>Vacuum-impregnated (VI) with nutrients<br><br>Co-fortified with calcium, vitamins C, D, and E                                                              | <ul style="list-style-type: none"> <li>• Color: L*a*b*, Hue angle, chroma</li> <li>• Texture</li> <li>• Acceptability at 3, 18, and 21 d storage at 4°C: <ul style="list-style-type: none"> <li>○ General appearance, odor, flavor, and texture rated using a hedonic scale from 0 to 5 (0= no perception, 1 is weak, 2 is less weak, 3 is average, 4 is less strong and 5 is strong)</li> <li>○ General quality was assessed on a scale of 0 to 3, where 0 is no quality</li> </ul> </li> </ul> | <p>“The VI process does not significantly affect the physicochemical properties of the cape gooseberry, mainly by conferring a greater intensity of orange color and superficial stains, less fresh appearance, greater sweetness, less cape gooseberry characteristic taste, softer texture, less firmness and juicy...the general quality of the [fresh gooseberry] exhibited a greater score than the [fortified gooseberry]”</p>  |
| Tapia et al., 2014                                              | Papaya slices (fresh)   | 60% of daily allowance/160 g<br><br>Vacuum-impregnated (VI) with nutrients<br><br>Co-fortified with vitamin C, zinc and calcium                                                                        | <ul style="list-style-type: none"> <li>• Folic acid retention at 4°C, 12 d</li> <li>• Flavor-related parameters: soluble solids, total solids, pH, titratable acidity, texture</li> <li>• Acceptability, via a hedonic scale 1-7 with trained panelists and consumer’s tests</li> </ul>                                                                                                                                                                                                          | <ul style="list-style-type: none"> <li>• Stability results not shown</li> <li>• Flavor parameter results not shown, but reported as “kept up during the evaluated period” and “functional fruit product maintained an intense red-orange color and an improved texture as compared to untreated fruit”</li> <li>• Sensory tests with a trained panel showed good acceptance; consumer panels yielded an acceptance &gt;80%</li> </ul> |
| Moreno et al., 2016                                             | Apple slices (dried)    | Impregnation solution of 200 mg/L apple juice used to fortify dried apple slices; final folic acid content depended on drying temperature, fortification method (vacuum impregnation or ohmic heating) | <ul style="list-style-type: none"> <li>• Mechanical properties (maximum force)</li> <li>• Color (L*a*B, ΔE*, brown index, chroma, hue angle)</li> </ul>                                                                                                                                                                                                                                                                                                                                          | <ul style="list-style-type: none"> <li>• Significantly higher firmness in fortified apple slices compared to control.</li> <li>• Significantly higher overall color score (ΔE), indicating visibly different samples compared to controls.</li> </ul>                                                                                                                                                                                 |

|                       |                                                     |                                                                          |                                                                                                                                                                                                                                                                                                                                                                                                                                                                                                                         |                                                                                                                                                                                                                                                                                                                                                                                                                                                               |
|-----------------------|-----------------------------------------------------|--------------------------------------------------------------------------|-------------------------------------------------------------------------------------------------------------------------------------------------------------------------------------------------------------------------------------------------------------------------------------------------------------------------------------------------------------------------------------------------------------------------------------------------------------------------------------------------------------------------|---------------------------------------------------------------------------------------------------------------------------------------------------------------------------------------------------------------------------------------------------------------------------------------------------------------------------------------------------------------------------------------------------------------------------------------------------------------|
| Tripathi et al., 2011 | Finger millet flour<br>( <i>eleusine coracana</i> ) | 1.4 mg/1 kg<br><br>Co-fortified with iron                                | Shelf life parameters: moisture and free fatty acids after 30 and 60 d                                                                                                                                                                                                                                                                                                                                                                                                                                                  | No significant changes to moisture or free fatty acids at 30 or 60 d                                                                                                                                                                                                                                                                                                                                                                                          |
| Pallavi et al., 2014  | Indian traditional sweet<br>(peanut <i>chikki</i> ) | 26.6 mg $\pm$ 0.668/kg<br><br>Co-fortified with calcium, iron, vitamin A | <ul style="list-style-type: none"> <li>• Breaking strength/snap</li> <li>• Color (L*a*B, <math>\Delta E^*</math>)</li> <li>• Moisture</li> <li>• Acceptability for color, snap, hardness, crunchiness, sweetness, peanut flavor and the overall quality score were evaluated by drawing a vertical line on the scale for coded products</li> <li>• Shelf life parameters: moisture, texture and peroxide value during storage at <math>37 \pm 1^\circ\text{C}</math> and <math>27 \pm 1^\circ\text{C}</math></li> </ul> | <ul style="list-style-type: none"> <li>• No significant differences in breaking strength, hardness, and crunchiness, and sweetness</li> <li>• Significantly lighter color in fortified chikki compared to control, but overall color scores were not significant.</li> <li>• Fortified chikki and control were similar in all quality attributes</li> <li>• No significant difference moisture during storage up to <math>105^\circ\text{C}</math></li> </ul> |

**Supplementary Table S2: Efficacy studies including fortification with folic acid but eliminated for not being able to isolate folic acid effect (sorted by food) (n=26)**

| Reference                           | Food details                                        | Co-fortificant nutrients*                                                                                           | Outcome measure**                                                                                                                                                                                                                                                                                                                                                                                                                                   |
|-------------------------------------|-----------------------------------------------------|---------------------------------------------------------------------------------------------------------------------|-----------------------------------------------------------------------------------------------------------------------------------------------------------------------------------------------------------------------------------------------------------------------------------------------------------------------------------------------------------------------------------------------------------------------------------------------------|
| <b>Milk/dairy</b>                   |                                                     |                                                                                                                     |                                                                                                                                                                                                                                                                                                                                                                                                                                                     |
| <i>Baro et al., 2003</i>            | Skimmed milk: <i>Puleva Omega 3</i>                 | Oleic acid and PUFA of the n-3 series, and vitamins A, D, E, B6                                                     | Risk factors for CVD in healthy volunteers: fatty acid composition of plasma, plasma lipids, vitamin E, LDL oxidation, plasma levels of ICAM-1, VCAM-1, Hcy, plasma B12, and <b>plasma folate</b>                                                                                                                                                                                                                                                   |
| <i>Carrero et al., 2004</i>         | Skimmed milk: <i>Puleva Omega 3</i>                 | Oleic acid and PUFA of the n-3 series, and vitamins A, D, E, B6                                                     | Risk factors for CVD in mildly hyperlipidemic volunteers: Plasma triacylglycerols, cholesterol, and HDL cholesterol, plasma fatty acid profile, tHcy, plasma vitamin E, <b>plasma folate</b> , lipoprotein(a), VCAM-1, and ICAM-1                                                                                                                                                                                                                   |
| <i>Carrero et al., 2005</i>         | Skimmed milk: <i>Puleva Omega 3</i>                 | Oleic acid and PUFA of the n-3 series, and vitamins A, D, E, B6                                                     | Risk factors for CVD and clinical outcomes in male PVD patients: triacylglycerols, total, LDL, and HDL cholesterol, plasma fatty acid profiles, plasma apolipoprotein B, tHcy, vitamin E, malondialdehyde, plasma vitamin B-6, <b>plasma folate</b> , <b>RBC folate</b> , plasma vitamin B-12, plasminogen activator inhibitor 1, E-selectin, sVCAM-1, sICAM-1 concentrations, hs-CRP, oxidized LD; Clinical outcomes: PFWD, ABI                    |
| <i>Carrero et al., 2006</i>         | Skimmed milk: <i>Puleva Omega 3</i>                 | Oleic acid and PUFA of the n-3 series, and vitamins A, D, E, B6                                                     | Risk factors for CVD and clinical outcomes in PVD patients: Plasma triacylglycerols, HDL and LDL cholesterol, plasma fatty acid profile, <b>plasma folate</b> , tHcy; Clinical outcomes: PFWD, ABI                                                                                                                                                                                                                                                  |
| <i>Carrero et al., 2007</i>         | Skimmed milk: <i>Puleva Omega 3</i>                 | Oleic acid and PUFA of the n-3 series, and vitamins A, D, E, B6                                                     | Risk factors for CVD in MI patients: triacylglycerols, total, HDL, and LDL cholesterol, plasma fatty acid profile, plasma apolipoprotein B, tHcy, vitamin E, malondialdehyde, plasma vitamin B-6, <b>plasma and RBC folate</b> , sVCAM-1, sICAM-1 concentrations, hs-CRP concentrations, oxidized LDL                                                                                                                                               |
| <i>Fonolla et al., 2009</i>         | Skimmed milk: <i>Puleva Omega 3</i>                 | Oleic acid and PUFA of the n-3 series, and vitamins A, D, E, B6                                                     | Risk factors for CVD in volunteers with moderate CVD risk: plasma glucose, triacylglycerols, cholesterol, HDL and LDL cholesterol, tHcy, <b>plasma folate</b> , hs-CRP                                                                                                                                                                                                                                                                              |
| <i>Martin-Bautista et al., 2010</i> | Skimmed milk: <i>Puleva Omega 3</i>                 | Oleic acid and PUFA of the n-3 series, and vitamins A, D, E, B6                                                     | Weight, height, BMI, plasma fatty acids, plasma vitamin E, <b>plasma folate</b> , <b>RBC folate</b> , plasma B6; bone metabolism: 25(OH)D, serum calcium, type I collagen carboxy-terminal telopeptide and intact parathormone levels, serum osteocalcin, plasma malondialdehyde                                                                                                                                                                    |
| <i>Fonolla-Joya et al., 2016</i>    | Skimmed milk (low lactose): <i>Puleva Digestiva</i> | EPA, DHA, oleic acid, soluble fiber, calcium, phosphate, vitamins B1, B3, B5, B6, B8, C, E                          | Risk factors for CVD and bone metabolism markers in healthy post-menopausal women: Serum total cholesterol, HDL and LDL cholesterol, triglycerides, and glucose concentrations, tHcy, plasma B6, <b>plasma folate</b> , <b>RBC folate</b> , hs-CRP, serum calcium, 25(OH)D; Bone metabolism: intact-parathyroid hormone, bone-specific alkaline phosphatase, b-crosslaps, serum osteoprotegerin, and receptor activator of nuclear factor kB ligand |
| <i>Baro L, et al. 2004</i>          | Dairy product: <i>Puleva Mama</i>                   | Vitamins A, B1, B2, B3, B5, B6, B7, C, D, E, calcium, phosphorus, zinc, magnesium, copper, iron, iodine, choline*** | <b>Plasma folate</b> , <b>RBC folate</b> , plasma B12, tHcy, lipids, serum transferrin, serum ferritin, plasma vitamin E                                                                                                                                                                                                                                                                                                                            |

|                          |                                   |                                                                                                                         |                                                                                                                                                                                                                                                                                                                                                                |
|--------------------------|-----------------------------------|-------------------------------------------------------------------------------------------------------------------------|----------------------------------------------------------------------------------------------------------------------------------------------------------------------------------------------------------------------------------------------------------------------------------------------------------------------------------------------------------------|
| Romeo et al., 2011       | Dairy product: <i>Puleva Max</i>  | EPA, DHA, oleic acid, vitamins A B1, B2, B3, B5, B6, B7, B12, C, D, E, calcium, phosphorus, zinc                        | White blood cells, lipid profile, serum proteins, total serum calcium, 25(OH)D, glucose, insulin, adiponectin and soluble circulating adhesion molecules levels                                                                                                                                                                                                |
| Benito et al., 2006      | Semi-skimmed milk: COVAP          | Oleic acid and PUFA of the n-3 series, vitamin E                                                                        | Risk factors for CVD in MS patients: total and HDL cholesterol, apolipoprotein B, triglycerols, glucose, insulin, hs-CRP, Hcy, and fatty acids contents in serum phospholipids                                                                                                                                                                                 |
| Cheong et al., 2016      | Milk powder: <i>Anmum Materna</i> | Vitamins B6, B12, D                                                                                                     | <b>Plasma folate, whole blood folate</b> , serum B12, 25(OH)D, and plasma pyridoxal 5'-phosphate                                                                                                                                                                                                                                                               |
| Grieger et al., 2009     | Whole milk                        | Calcium, vitamin D                                                                                                      | Nutrient intake, serum calcium, 25(OH)D, <b>serum folate</b> , vitamin B12, C-terminal collagen I telopeptide, and terminal propeptide of type I procollagen, parathyroid hormone, bone turnover, quantitative heel ultrasound, falls, timed up and go, speed, and hand grip strength                                                                          |
| Achón et al., 2011       | Whole milk<br>Skimmed milk        | Vitamins A, D, E, calcium and phosphorus                                                                                | <b>Plasma folate</b>                                                                                                                                                                                                                                                                                                                                           |
| Ntzouvani et al., 2013   | Low-fat milk                      | Plant sterols, linoleic acid, alpha linolenic acid, vitamins A, B6, B12, C, E, magnesium, selenium                      | Enzymatic activity of lyso-PAF AT and Lp-PLA2 in leukocytes and serum, fasting triacylglycerol, HDL and LDL cholesterol, triglycerides, glucose, apolipoprotein A1, apolipoprotein B, insulin, tHcy, <b>plasma folate</b> , vitamin B12, total antioxidant capacity, CRP, interleukin-6, tumour necrosis factor alpha                                          |
| Petrogianni et al., 2014 | Low-fat milk                      | Plant sterols, linoleic acid, alpha linolenic acid, vitamins A, B6, B12, C, E, magnesium, selenium                      | Weight, height, blood pressure, fasting HDL cholesterol, LDL cholesterol, very-LDL cholesterol, tHcy, <b>plasma folate</b> , vitamin B12, fatty acids content in RBC membranes                                                                                                                                                                                 |
| Kuriyan et al., 2016     | Malt and cocoa-based milk         | Vitamins A, C, D, B1, B2, B3, B6, B7, B12, copper, iodine, iron, manganese, phosphorus, selenium, zinc                  | Hemoglobin, serum ferritin, soluble transferrin receptor, CRP, vitamin B2, B12, D, <b>RBC folate</b> , serum selenium, morbidity: diarrhea, vomiting, fever, runny nose, visit to physician, hospitalizations; physical performance, cognitive tests, height, weight                                                                                           |
| Mardones et al., 2008    | Milk powder: <i>Maman</i>         | Omega 3 and omega 6 fatty acids, selenium, iron, zinc, manganese, calcium, phosphorus, vitamin A, B1, B2, B3, B6, B7, C | Birth weight, gestation duration, infant length, head circumference                                                                                                                                                                                                                                                                                            |
| Wibowo et al., 2016      | Milk powder                       | Calcium, zinc, vitamins A, B1, C, DHA, prebiotic (inulin), and <i>B. animalis</i> subsp. <i>lactis</i> DR10             | Hemoglobin, transferrin, complete blood count, serum ferritin, retinol, 25(OH)D, vitamins B1, B2, B12, zinc, phospholipid, <b>plasma folate</b> ; DHA, <i>B. lactis</i> HNO19 in fecal samples, tumor necrosis factor- $\alpha$ , interleukin-6, polymorphonuclear leukocyte phagocytosis; birth outcomes (delivery date, mode, birth weight, and APGAR score) |
| <b>Other beverages</b>   |                                   |                                                                                                                         |                                                                                                                                                                                                                                                                                                                                                                |
| Järvenpää et al., 2007   | Mineral water                     | Calcium, vitamins B6, B12, D                                                                                            | <b>Serum folate, RBC folate</b> , serum vitamin B12, Plasma Hcy                                                                                                                                                                                                                                                                                                |



|                               |                               |                                                                                                                     |                                                                                                                   |
|-------------------------------|-------------------------------|---------------------------------------------------------------------------------------------------------------------|-------------------------------------------------------------------------------------------------------------------|
| <i>Mayengbam et al., 2019</i> | 5 Hour Energy™, decaffeinated | Vitamins B6, B12                                                                                                    | Glucose metabolism, incretin response, metabolomics profile, responsiveness to a glucose load                     |
| <i>Carter et al., 2010</i>    | Beverage (no details)         | Vitamins A, C                                                                                                       | Plasma vitamin C, <b>serum folate</b>                                                                             |
| <i>Oliva et al., 2016</i>     | Beverage (no details)         | Vitamin B2, B12, D                                                                                                  | Vitamin D, B12, B2, <b>blood folate</b> (not specified)                                                           |
| <b>Condiments</b>             |                               |                                                                                                                     |                                                                                                                   |
| <i>Kumar et al., 2007</i>     | Salt                          | Vitamins A, B1, B2, B3, B6, B12, calcium, iron, iodine                                                              | Hemoglobin, hematocrit, RBC count, urinary iodine, serum vitamin A, cognitive tests for memory, concentration, IQ |
| <i>Kumar et al., 2014</i>     | Salt                          | Vitamin A, B12, iron, iodine                                                                                        | Hemoglobin, serum retinol, urinary iodine, CRP, AGP                                                               |
| <i>Chen et al., 2011</i>      | Seasoning powder              | Powder I: vitamin A<br>Powder II: vitamin A and iron<br>Powder III: vitamins A, B1, B2, B3, B9, iron, zinc, calcium | Serum retinol, serum ferritin, weight, height, morbidity (respiratory outcomes, diarrhea outcomes)                |

\*In addition to folic acid

\*\*Blood folate outcomes are **bolded**

\*\*\*Not specified which nutrients are extrinsic to the dairy product

Abbreviations (in order of appearance): PUFA, polyunsaturated fatty acids of the n-3 series; CVD, cardiovascular disease; LDL, low-density lipoprotein; ICAM-1, intercellular adhesion molecule-1; VCAM-1, Vascular cell adhesion molecule-1; tHcy, total fasting homocysteine concentrations; Hcy, homocysteine (not described as total fasting); HDL, high density lipoprotein; PVD, peripheral vascular disease; sVCAM-1, soluble vascular adhesion molecule 1; sICAM-1, soluble intercellular cell adhesion molecule 1; hs-CRP, high-sensitivity C-reactive protein; PFWD, pain-free walking distance; ABI, ankle-brachial index; MI, myocardial infarction; BMI, body mass index; 25(OH)D, plasma 25 hydroxyvitamin D; EPA, eicosapentaenoic acid; DHA, docosahexaenoic acid; MS, multiple sclerosis; APGAR; Appearance, Pulse, Grimace, Activity, and Respiration; IQ, intelligence quotient; AGP, alpha(1)-acid glycoprotein
